# Supplementary material
Source: publisher figshare collection journal article supplement (https://tandf.figshare.com/articles/dataset/_/12994232)
Supplement: Supplementary file 1 [file 1]

P A U P \*  
Version 4.0a (build 167) for Macintosh (X86) (built on Feb 1 2020 at 22:15:41)  
Tuesday, 16. June 2020 at 10:21:01 Central European Summer Time

-----NOTICE-----  
This is a test version that is still changing rapidly.  
It will expire on 1 Aug 2020.  
  
Please report bugs to dave@phylosolutions.com  
-----

```
#####  
#                                     #  
#                               WARNING                               #  
#                                     #  
# The GUI version of PAUP for Mac will NOT run under               #  
# MacOS 10.15 (Catalina). Do not upgrade to Catalina                #  
# if having a GUI version of PAUP* on your Mac is more              #  
# important to you than having the latest MacOS version!           #  
#                                     #  
# I hope to have a 64-bit version sometime in early 2020.          #  
# Please join the Google Group paup-announce to receive            #  
# update announcements.                                             #  
#                                     #  
#####
```

Running on IA-32 architecture (64-bit word length)  
SSE vectorization enabled  
SSSE3 instructions supported  
Multithreading enabled for likelihood using Pthreads  
Compiled using Intel compiler (icc) 11.1.0 (build 20091012)

Processing of file "~/Desktop/Supplementary\_data\_2\_R1.nex" begins...

Data matrix has 33 taxa, 102 characters  
Valid character-state symbols: 01234  
Missing data identified by '?'  
Gaps identified by '-'

Character types changed:  
Of 102 total characters:  
All characters are of type 'unord'  
All characters have equal weight

\*\*\* Skipping "NOTES" block

\*\*\* Skipping "MESQUITECHARMODELS" block

Page 2 of 34

|    | Taxon            | Status |
|----|------------------|--------|
| 1  | Rhinobatos       | 0      |
| 2  | Raja             | 0      |
| 3  | Hexatrygon       | –      |
| 4  | Paratrygon       | –      |
| 5  | Styracura        | –      |
| 6  | Heliotrygon      | –      |
| 7  | Plesiotrygon     | –      |
| 8  | Potamotrygon     | –      |
| 9  | Aetomyleus       | –      |
| 10 | Myliobatis       | –      |
| 11 | Weissobatis      | –      |
| 12 | Promyliobatis    | –      |
| 13 | Aetobatus        | –      |
| 14 | Rhinoptera       | –      |
| 15 | Mobula           | –      |
| 16 | Pastinachus      | –      |
| 17 | Himantura        | –      |
| 18 | Dasyatis         | –      |
| 19 | Pteroplatytrygon | –      |
| 20 | Neotrygon        | –      |
| 21 | Taeniura         | –      |
| 22 | Protohimantura   | –      |
| 23 | Heliobatis       | –      |

- 24 Asterotrygon -
- 25 Tethytrygon -
- 26 Urobatis -
- 27 Urotrygon -
- 28 Trygonoptera -
- 29 Urolophus -
- 30 Arechia -
- 31 Gymnura -
- 32 Plesiobatis -
- 33 Lessiniabatis -

paup> CStatus full;

Character-status summary:  
Current optimality criterion = parsimony  
No characters are excluded  
Of 102 total characters:  
All characters are of type 'unord'  
All characters have equal weight  
3 characters are constant (proportion = 0.0294118)  
10 variable characters are parsimony-uninformative  
Number of parsimony-informative characters = 89

Current status of all characters:

| Character                                                                     | Type  | Status | Weight | States |
|-------------------------------------------------------------------------------|-------|--------|--------|--------|
| 1 (Tubules of subpleural components of hyomandibular lateral line canals)     | Unord | -      | 1      | 01     |
| 2 (Subpleural components of the hyomandibular lateral line canals)            | Unord | -      | 1      | 012    |
| 3 (Suborbital components of infraorbital lateral line canals)                 | Unord | -      | 1      | 012    |
| 4 (Scapular loops formed by scapular components of trunk lateral line canals) | Unord | -      | 1      | 01     |
| 5 (Anterior process of neurocranium)                                          | Unord | -      | 1      | 01     |
| 6 (Preorbital process)                                                        | Unord | -      | 1      | 01     |
| 7 (Preorbital canal for passage of superficial ophthalmic nerve)              | Unord | -      | 1      | 01     |
| 8 (Foramen for the optic (II) nerve)                                          | Unord | -      | 1      | 01     |
| 9 (Postorbital process of neurocranium)                                       | Unord | -      | 1      | 01     |
| 10 (Extent of orbital region)                                                 | Unord | -      | 1      | 01     |
| 11 (Postorbital process)                                                      | Unord | -      | 1      | 01     |
| 12 (Ventrolateral expansion of nasal capsules)                                | Unord | -      | 1      | 01     |
| 13 (Articulation between hyomandibula and Meckel?s cartilage)                 | Unord | -      | 1      | 01     |
| 14 (Angular cartilages)                                                       | Unord | -      | 1      | 01     |
| 15 (Secondary hyomandibular cartilages)                                       | Unord | -      | 1      | 01     |
| 16 (Symphysial fusion of upper and lower jaws)                                | Unord | -      | 1      | 01     |
| 17 (Mandibular width at symphysis)                                            | Unord | -      | 1      | 01     |
| 18 (Lateral projections of lower jaws)                                        | Unord | -      | 1      | 01     |
| 19 (Basihyal cartilage)                                                       | Unord | -      | 1      | 0123   |
| 20 (Fusion of ventral pseudohyoid and first ceratobranchial)                  | Unord | -      | 1      | 01     |
| 21 (Arrangement of posterior ceratobranchials)                                | Unord | -      | 1      | 012    |
| 22 (Median projection of the basibranchial medial plate)                      | Unord | -      | 1      | 01     |

|                                                                                      |       |    |   |      |
|--------------------------------------------------------------------------------------|-------|----|---|------|
| 23 (Articulation between fifth epi? and ceratobranchial elements to scapulocoracoid) | Unord | –  | 1 | 01   |
| 24 (Lateral stay of synarcual)                                                       | Unord | –  | 1 | 012  |
| 25 (Fossa on dorsal scapular region)                                                 | Unord | –  | 1 | 01   |
| 26 (Contact between pro- and mesopterygium in the pectoral fin)                      | Unord | –  | 1 | 01   |
| 27 (Distinct components of the mesopterygium)                                        | Unord | –  | 1 | 012  |
| 28 (Lateral expansion of radials in pectoral region)                                 | Unord | –  | 1 | 01   |
| 29 (External margin of mesopterygium)                                                | Unord | –  | 1 | 0123 |
| 30 (Median prepelvic process)                                                        | Unord | –  | 1 | 01   |
| 31 (Pelvic girdle shape)                                                             | Unord | –  | 1 | 01   |
| 32 (Dorsal fin)                                                                      | Unord | –  | 1 | 01   |
| 33 (Cartilaginous rod in tail)                                                       | Unord | –  | 1 | 01   |
| 34 (Caudal fin)                                                                      | Unord | –  | 1 | 012  |
| 35 (Adductor mandibulae complex)                                                     | Unord | –  | 1 | 01   |
| 36 (Spiracularis muscle)                                                             | Unord | –  | 1 | 012  |
| 37 (Depressor mandibularis muscle)                                                   | Unord | –  | 1 | 01   |
| 38 (Coracohyoideus muscle)                                                           | Unord | –  | 1 | 01   |
| 39 (Urea retention)                                                                  | Unord | –  | 1 | 01   |
| 40 (Rectal gland)                                                                    | Unord | –  | 1 | 01   |
| 41 (Spiracular tentacle)                                                             | Unord | –  | 1 | 01   |
| 42 (Cephalic lobes)                                                                  | Unord | –  | 1 | 0123 |
| 43 (Nasal curtain)                                                                   | Unord | –  | 1 | 01   |
| 44 (Tooth type in both upper and lower jaws)                                         | Unord | –  | 1 | 01   |
| 45 (Arrangement of teeth in both upper and lower jaws)                               | Unord | –  | 1 | 01   |
| 46 (Tooth shape)                                                                     | Unord | –  | 1 | 012  |
| 47 (Lateral teeth)                                                                   | Unord | U  | 1 | 01   |
| 48 (Differentiation of median teeth from lateral teeth)                              | Unord | –  | 1 | 01   |
| 49 (Differentiation among lateral teeth)                                             | Unord | U  | 1 | 01   |
| 50 (Relative amount of curvature in expanded lower teeth)                            | Unord | –  | 1 | 012  |
| 51 (Upper tooth curvature)                                                           | Unord | U  | 1 | 01   |
| 52 (Direction of tooth curvature)                                                    | Unord | U  | 1 | 12   |
| 53 (Tooth association)                                                               | Unord | –  | 1 | 01   |
| 54 (Tooth Interlocking mechanism)                                                    | Unord | –  | 1 | 012  |
| 55 (Shape of interlocking tongue)                                                    | Unord | U  | 1 | 012  |
| 56 (Crown height)                                                                    | Unord | –  | 1 | 01   |
| 57 (Occlusal surface)                                                                | Unord | –  | 1 | 012  |
| 58 (Crown shape in anterior or posterior view)                                       | –     | UC | 1 | 0    |
| 59 (Lateral margins)                                                                 | –     | UC | 1 | 0    |
| 60 (Root type)                                                                       | Unord | –  | 1 | 01   |
| 61 (Number of roots)                                                                 | Unord | –  | 1 | 01   |
| 62 (Roots in basal view)                                                             | Unord | –  | 1 | 012  |
| 63 (Distance between roots)                                                          | Unord | –  | 1 | 01   |
| 64 (Inclination of roots)                                                            | Unord | U  | 1 | 012  |
| 65 (Root groove position)                                                            | –     | UC | 1 | 01   |
| 66 (Levator and depressor rostri muscles)                                            | Unord | –  | 1 | 01   |
| 67 (Serrated tail stings)                                                            | Unord | –  | 1 | 01   |
| 68 (Placoid scales)                                                                  | Unord | –  | 1 | 012  |
| 69 (Thorns)                                                                          | Unord | –  | 1 | 01   |
| 70 (Pulp cavities in tooth roots)                                                    | Unord | –  | 1 | 0123 |
| 71 (Tooth vascularization)                                                           | Unord | –  | 1 | 012  |

|                                                                                                       |       |   |   |      |
|-------------------------------------------------------------------------------------------------------|-------|---|---|------|
| 72 (Infraorbital loop of suborbital and infraorbital canals)                                          | Unord | – | 1 | 0123 |
| 73 (Rostral cartilage)                                                                                | Unord | – | 1 | 01   |
| 74 (Postorbital process)                                                                              | Unord | – | 1 | 01   |
| 75 (Jugal arch)                                                                                       | Unord | – | 1 | 01   |
| 76 (Basihyal and first hypobranchial)                                                                 | Unord | – | 1 | 0123 |
| 77 (Suprascapulae)                                                                                    | Unord | U | 1 | 012  |
| 78 (Ball and socket articulation between scapular process and synarcual)                              | Unord | – | 1 | 01   |
| 79 (Second (thoracolumbar) synarcual)                                                                 | Unord | – | 1 | 01   |
| 80 (Ribs)                                                                                             | Unord | U | 1 | 01   |
| 81 (Segmentation of propterygium)                                                                     | Unord | – | 1 | 0123 |
| 82 (Pseudosiphon)                                                                                     | Unord | – | 1 | 01   |
| 83 (Dorsal marginal clasper cartilage)                                                                | Unord | – | 1 | 01   |
| 84 (Dorsal terminal cartilage)                                                                        | Unord | – | 1 | 01   |
| 85 (Cartilage forming component claw)                                                                 | Unord | – | 1 | 0123 |
| 86 (Ventral terminal cartilage (accessory terminal 1 cartilage in rajids))                            | Unord | U | 1 | 012  |
| 87 (Ventral terminal cartilage (accessory terminal 1 cartilage in rajids))                            | Unord | – | 1 | 01   |
| 88 (Spiracularis)                                                                                     | Unord | – | 1 | 0123 |
| 89 (Sexual heterodonty)                                                                               | Unord | – | 1 | 01   |
| 90 (Medial symphyseal processes of the Meckel's cartilage)                                            | Unord | – | 1 | 01   |
| 91 (Lateral processes of the palatoquadrate extending far anteriorly)                                 | Unord | – | 1 | 01   |
| 92 (Anterior processes of the Meckel's cartilage)                                                     | Unord | – | 1 | 012  |
| 93 (Lateral oral diastema alt)                                                                        | Unord | – | 1 | 01   |
| 94 (Upper jaw profile)                                                                                | Unord | – | 1 | 012  |
| 95 (Upper jaw mineralization)                                                                         | Unord | U | 1 | 01   |
| 96 (Lower jaw profile)                                                                                | Unord | – | 1 | 01   |
| 97 (Upper and lower jaw trabeculae)                                                                   | Unord | – | 1 | 012  |
| 98 (Second transverse keel)                                                                           | Unord | – | 1 | 01   |
| 99 (Calcification pattern of radials)                                                                 | Unord | – | 1 | 01   |
| 100 (Body disc shape)                                                                                 | Unord | – | 1 | 01   |
| 101 (Mid-dorsal surface of disc covered by heart-shaped denticles arranged in an antero-posteriorly ) | Unord | – | 1 | 01   |
| 102 (File of enlarged ?caniniform? teeth in the upper jaw)                                            | Unord | – | 1 | 01   |

paup> Set maxtrees=30000;

Maxtrees reset to 30000

paup> HSearch;

Heuristic search settings:  
Optimality criterion = parsimony  
Character-status summary:  
Of 102 total characters:  
All characters are of type 'unord'  
All characters have equal weight  
3 characters are constant (proportion = 0.0294118)  
10 variable characters are parsimony-uninformative  
Number of parsimony-informative characters = 89  
Gaps are treated as "missing"  
Multistate taxa interpreted as uncertainty









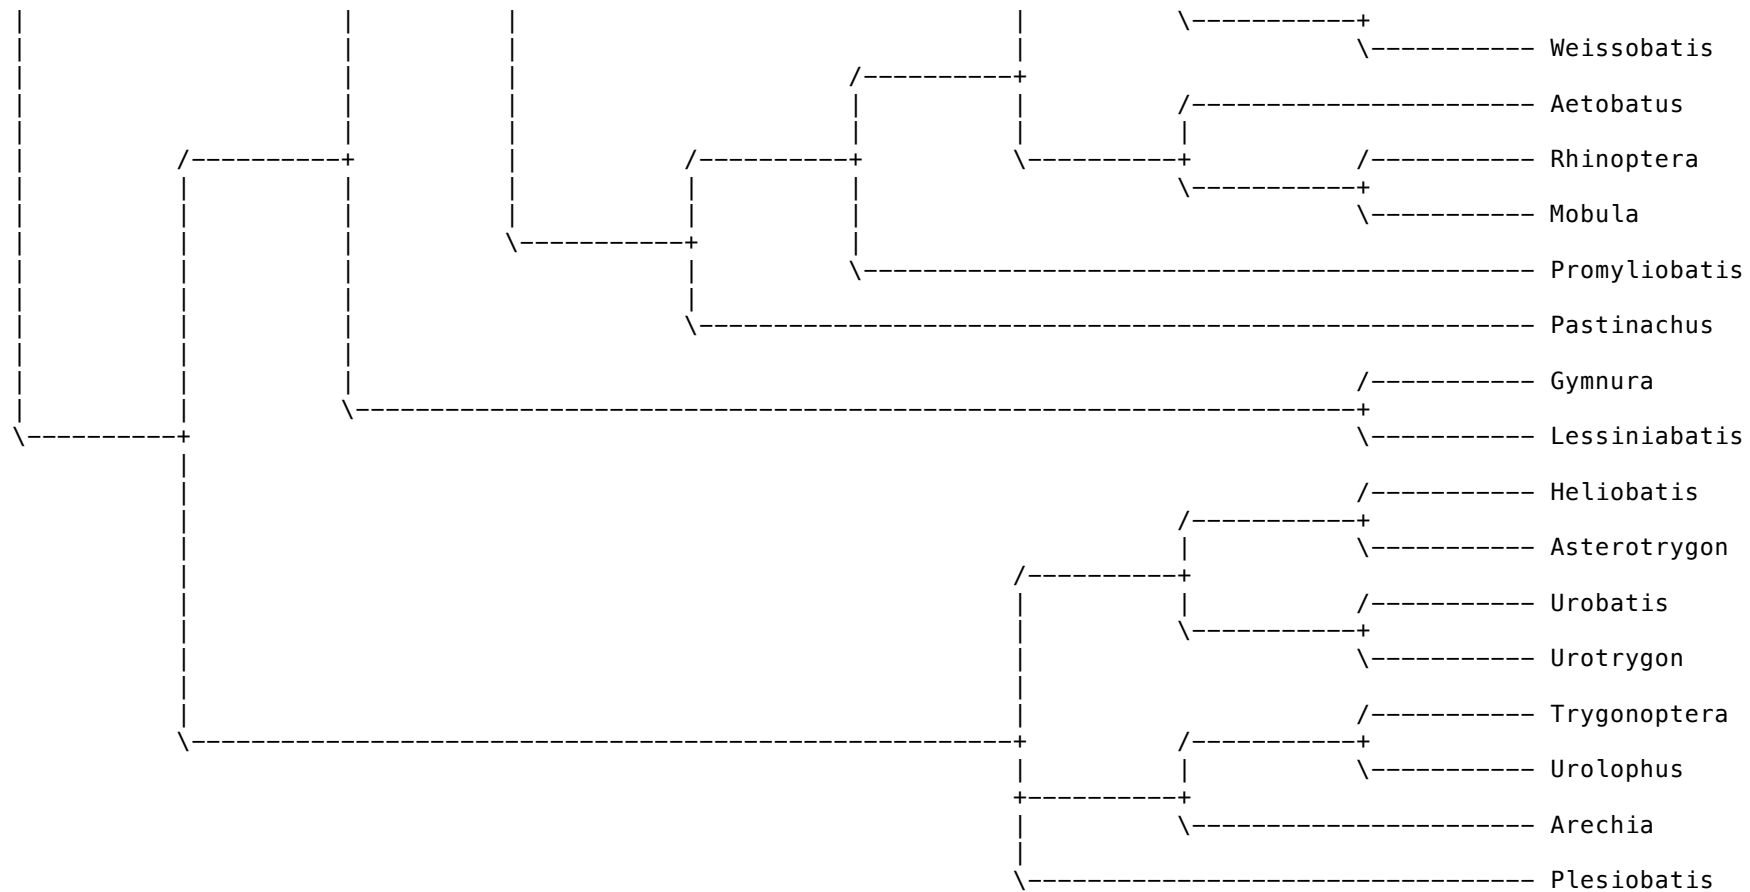

Tree 2 (rooted using user-specified outgroup)

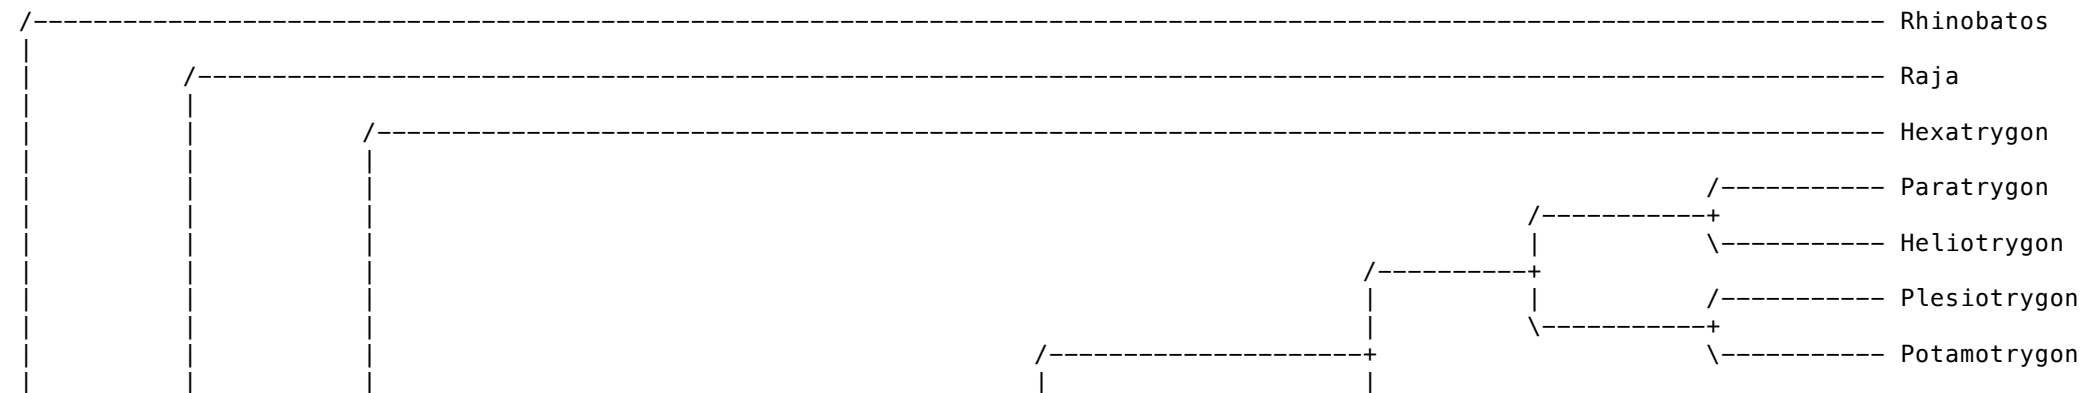

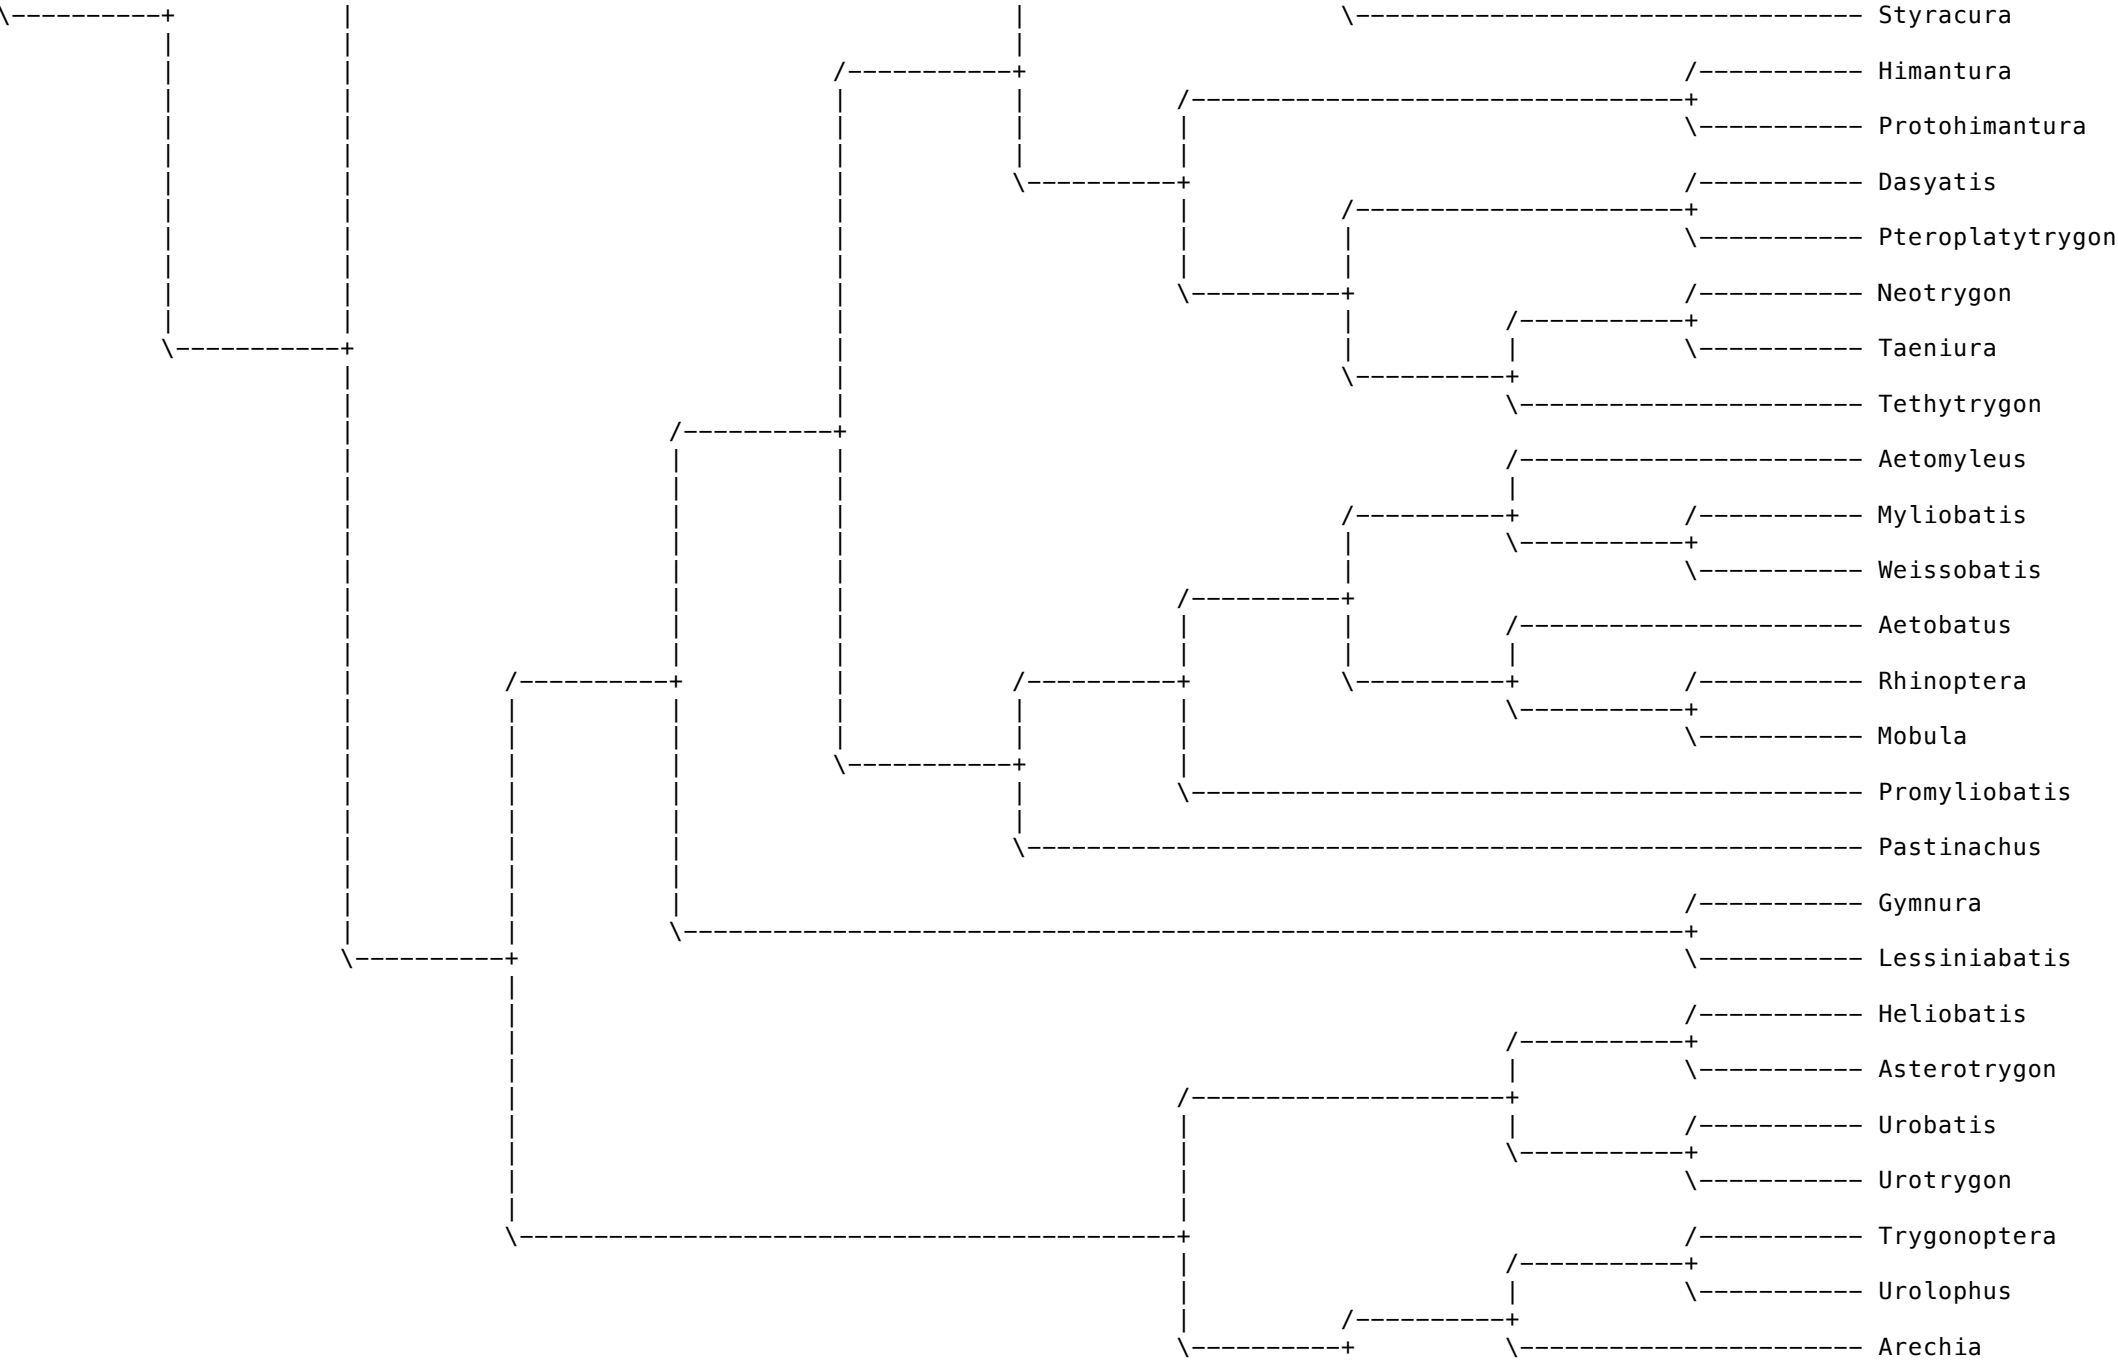

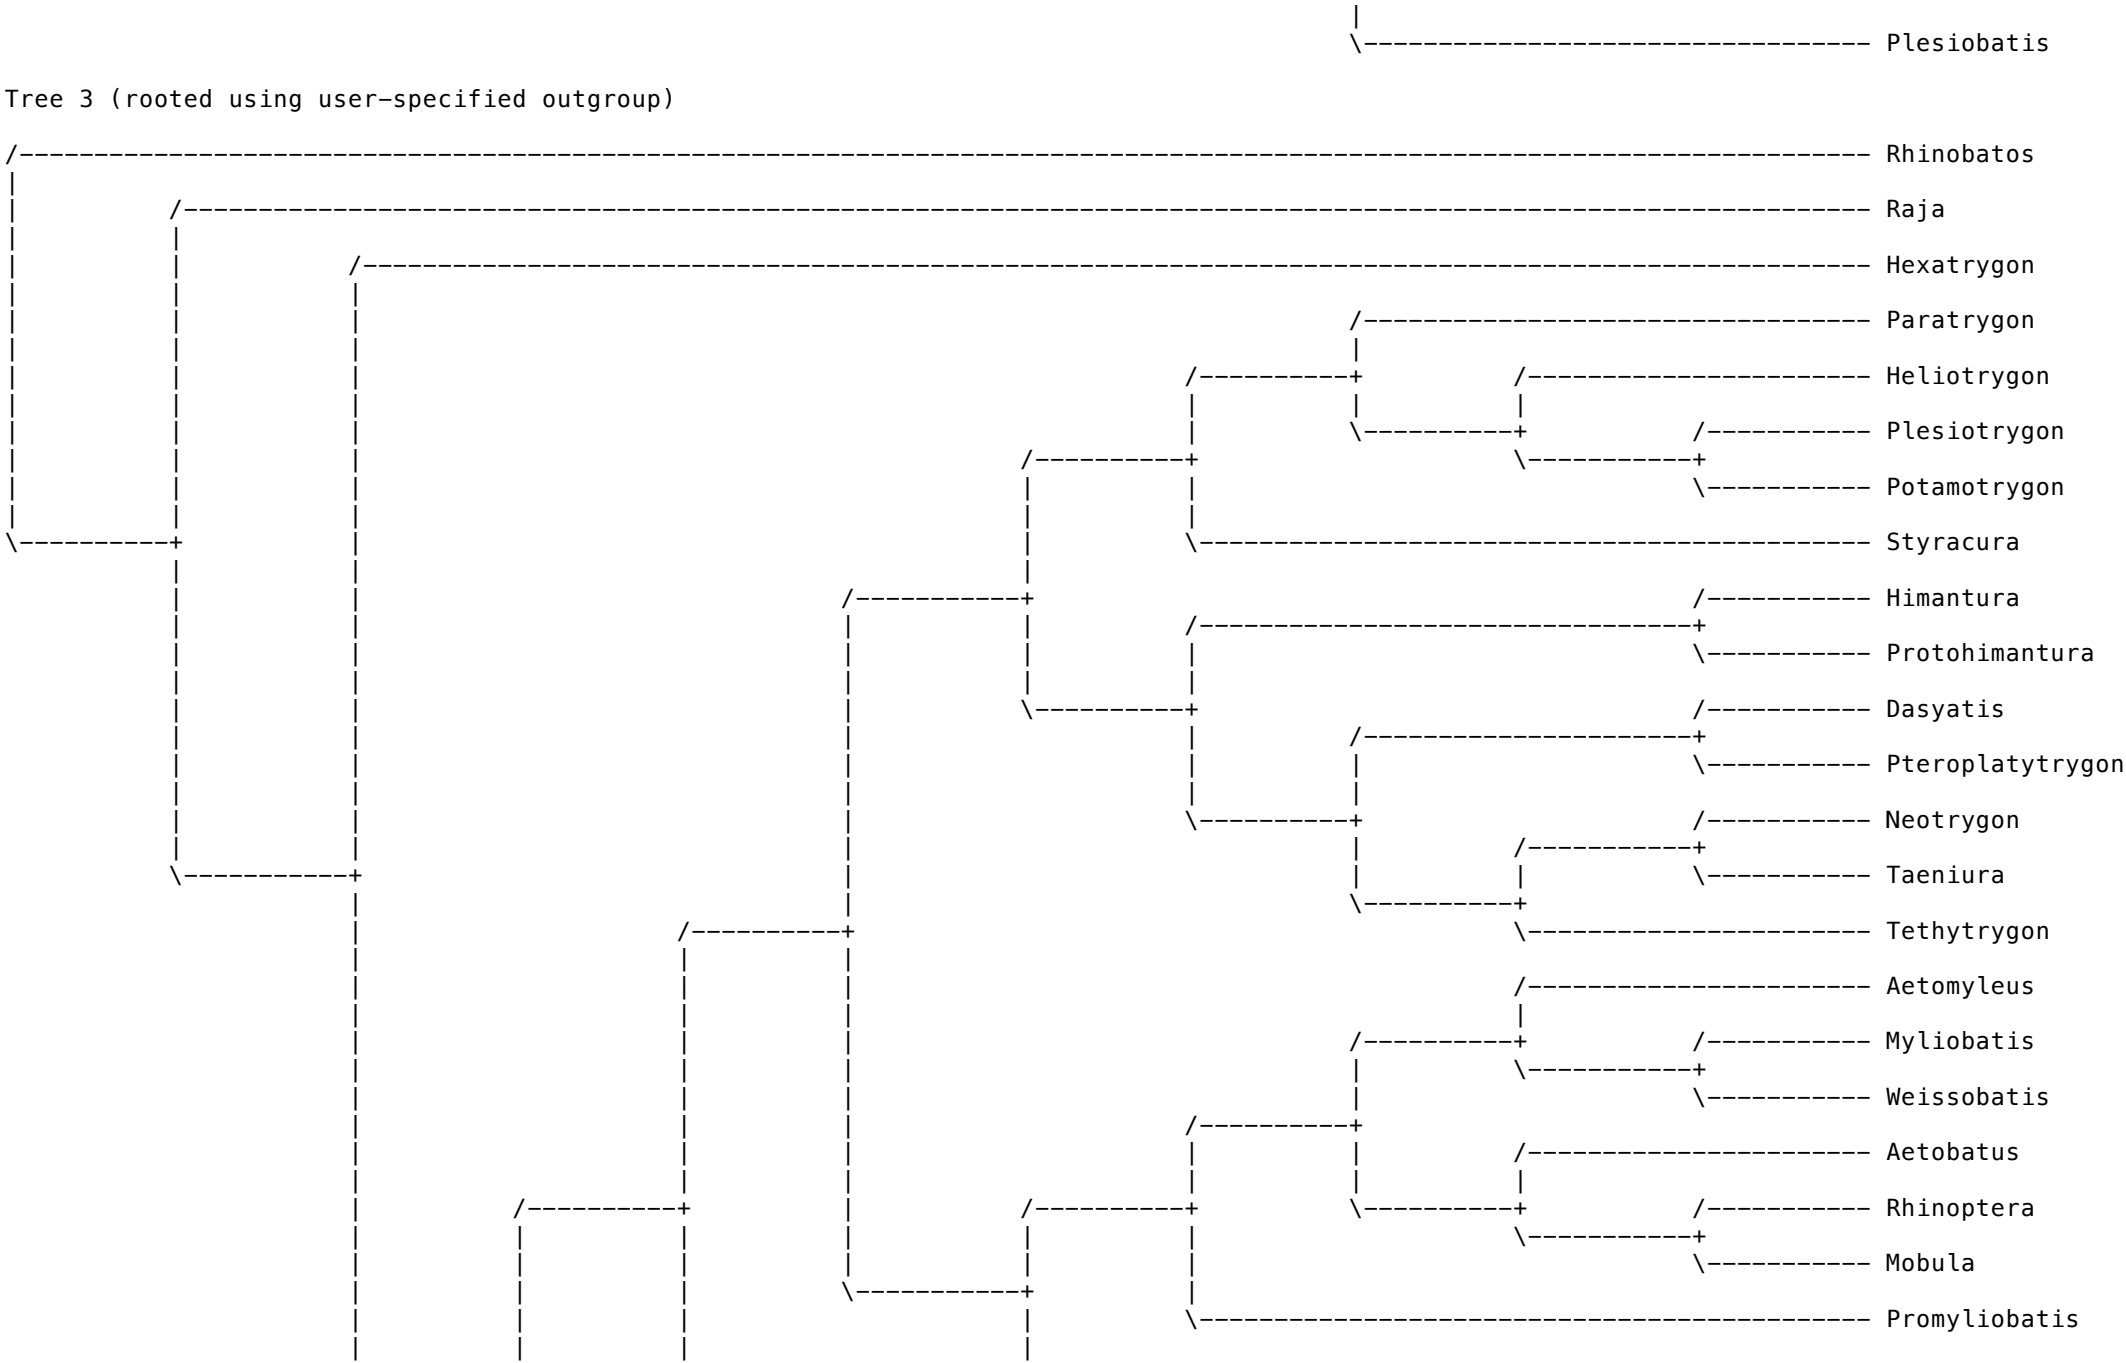

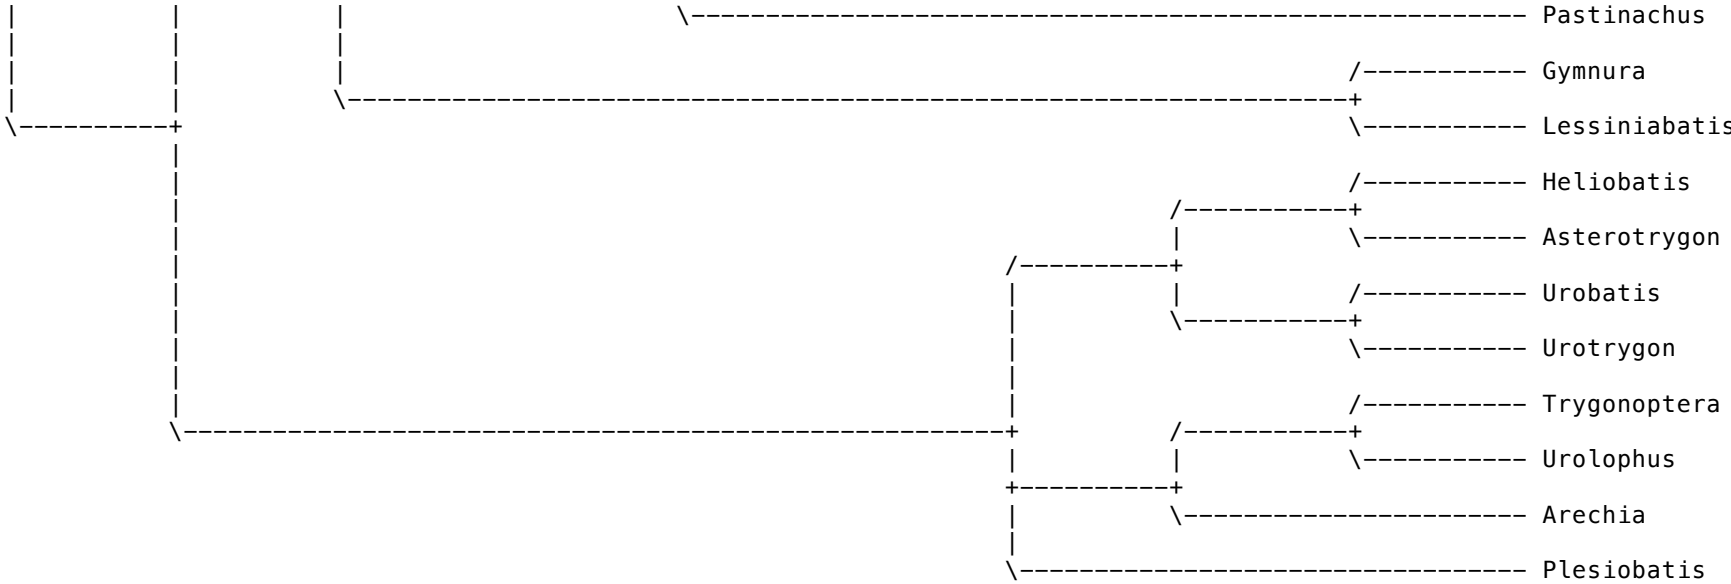

Tree 4 (rooted using user-specified outgroup)

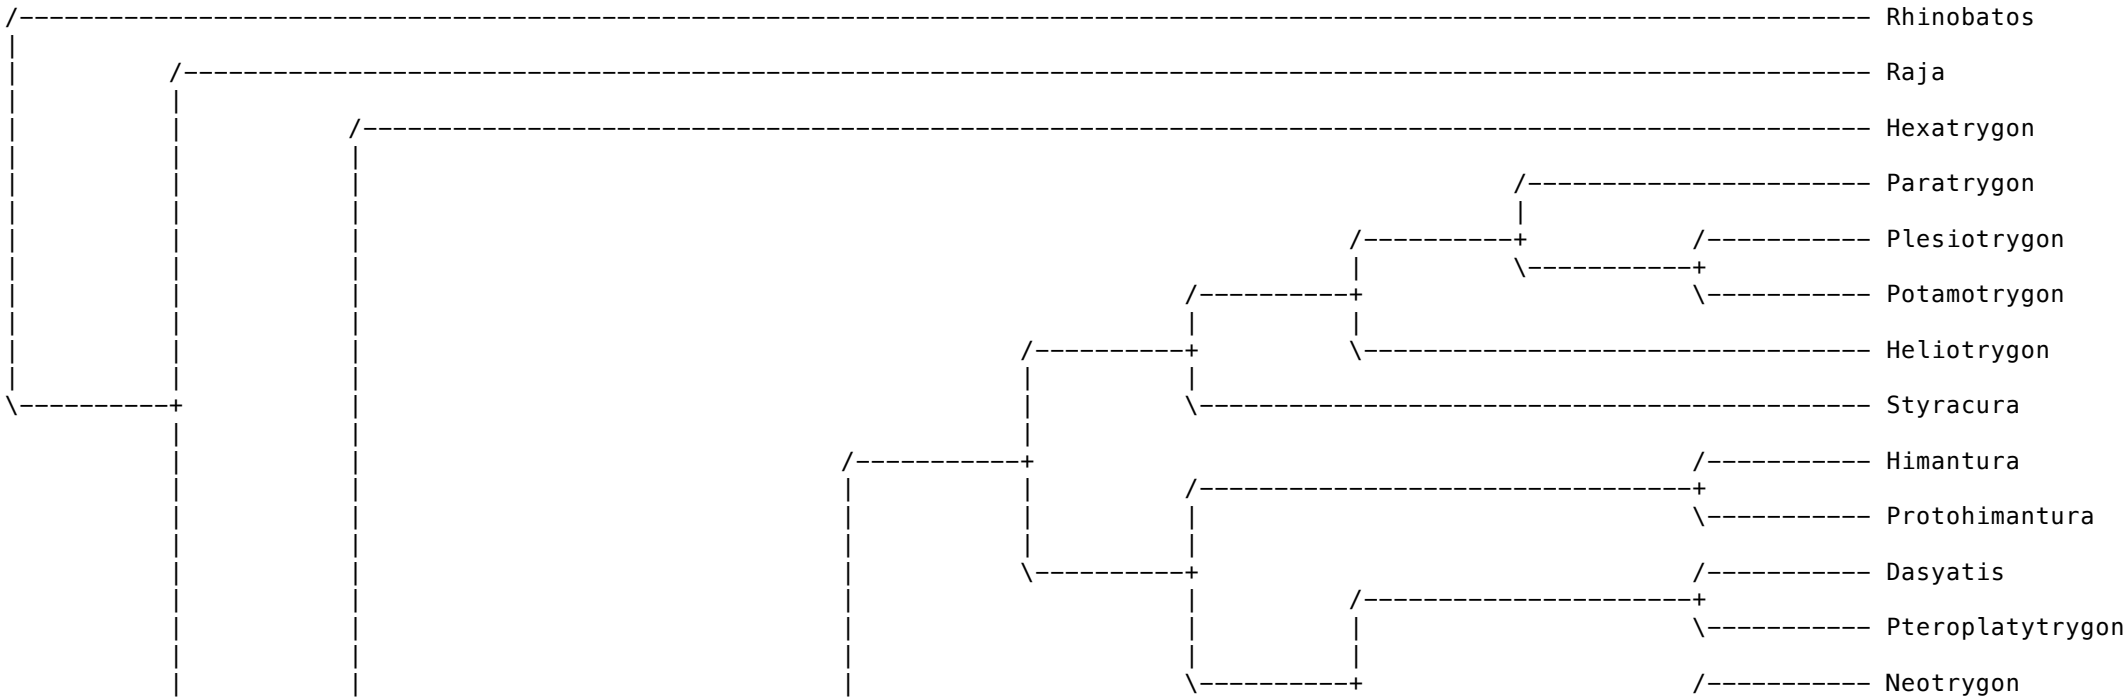

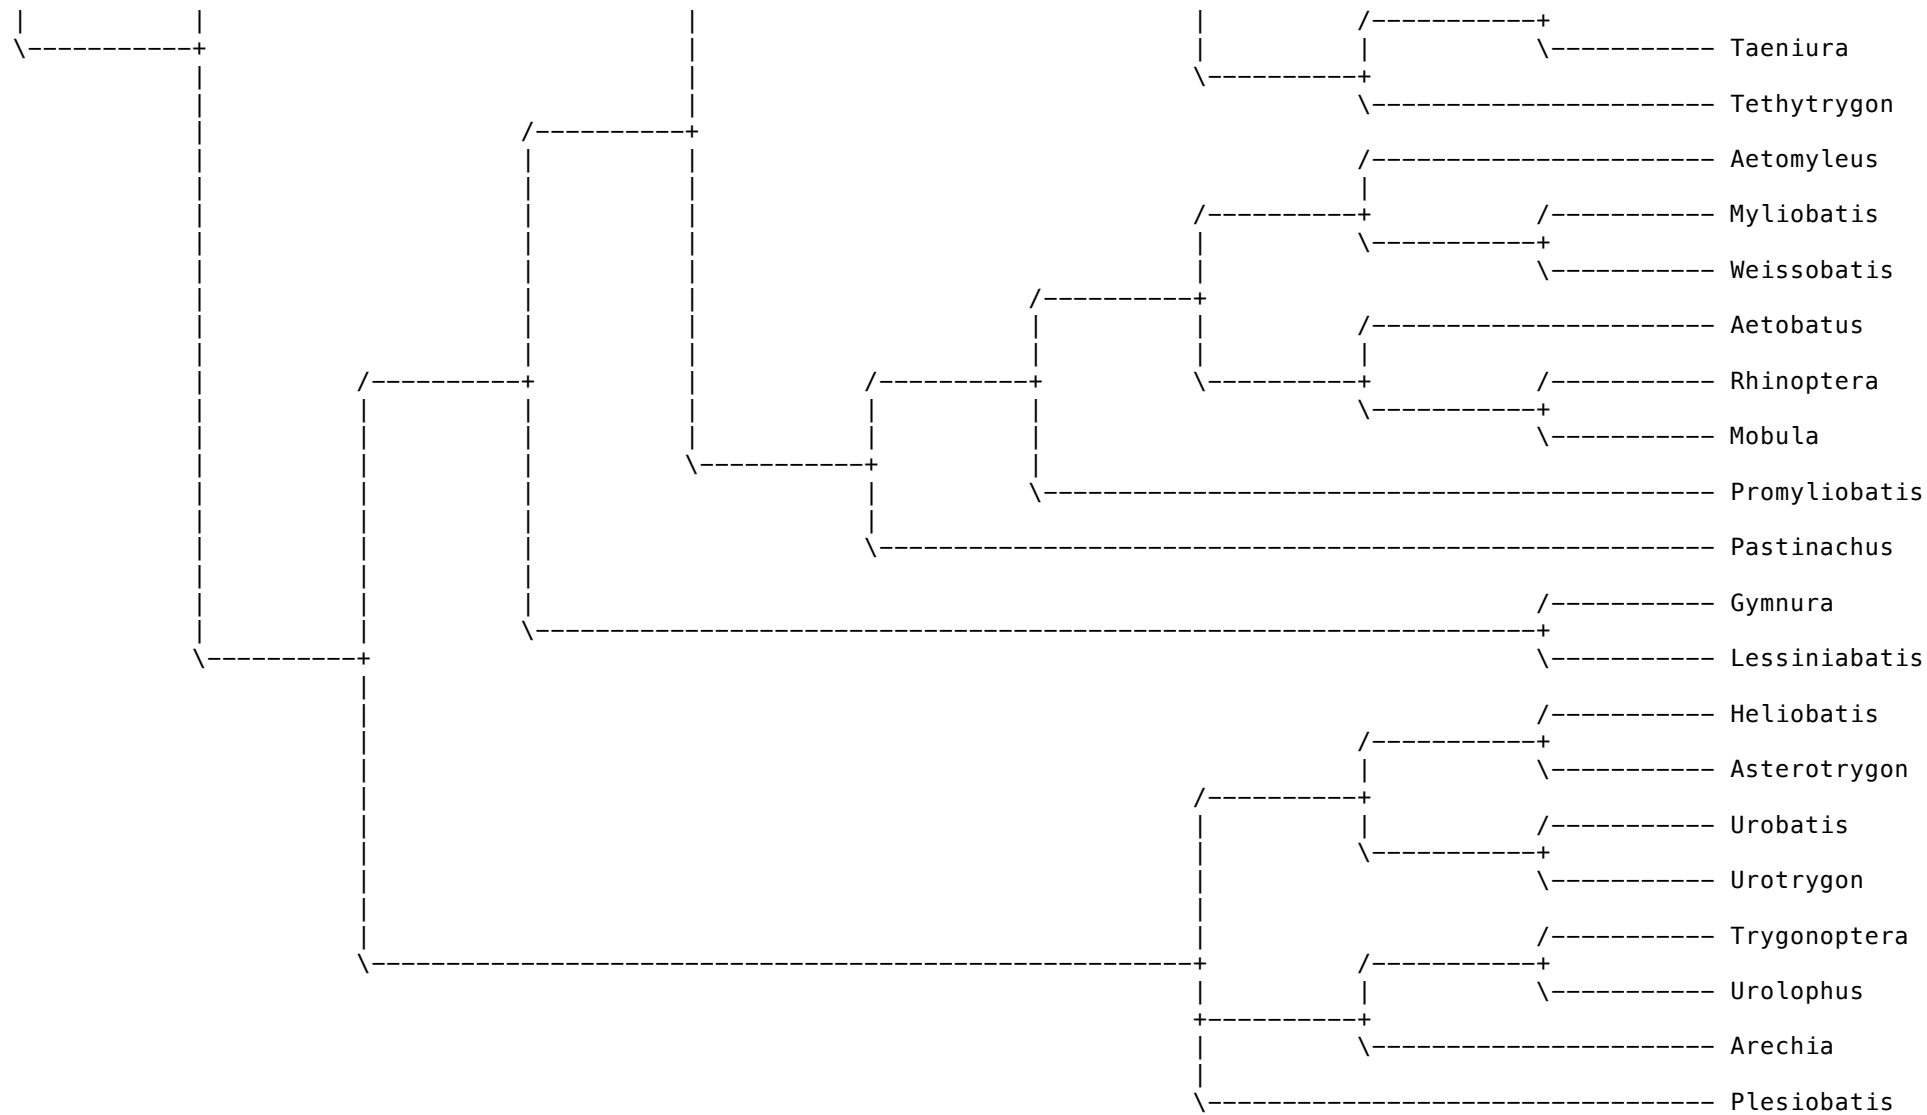

Tree 5 (rooted using user-specified outgroup)

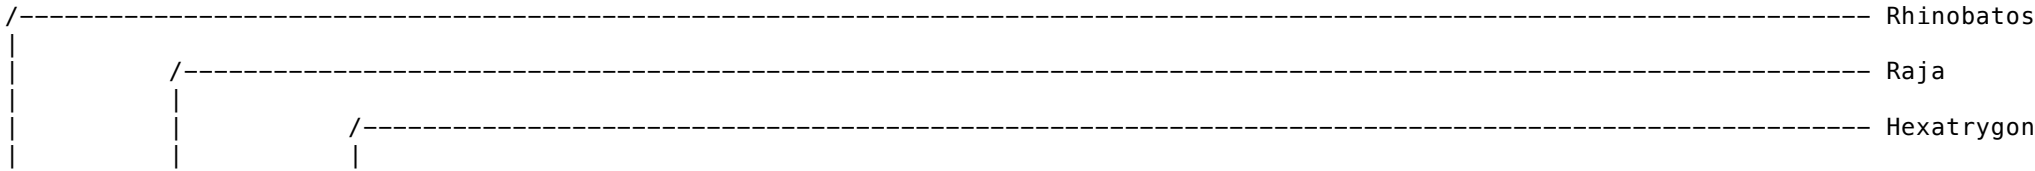

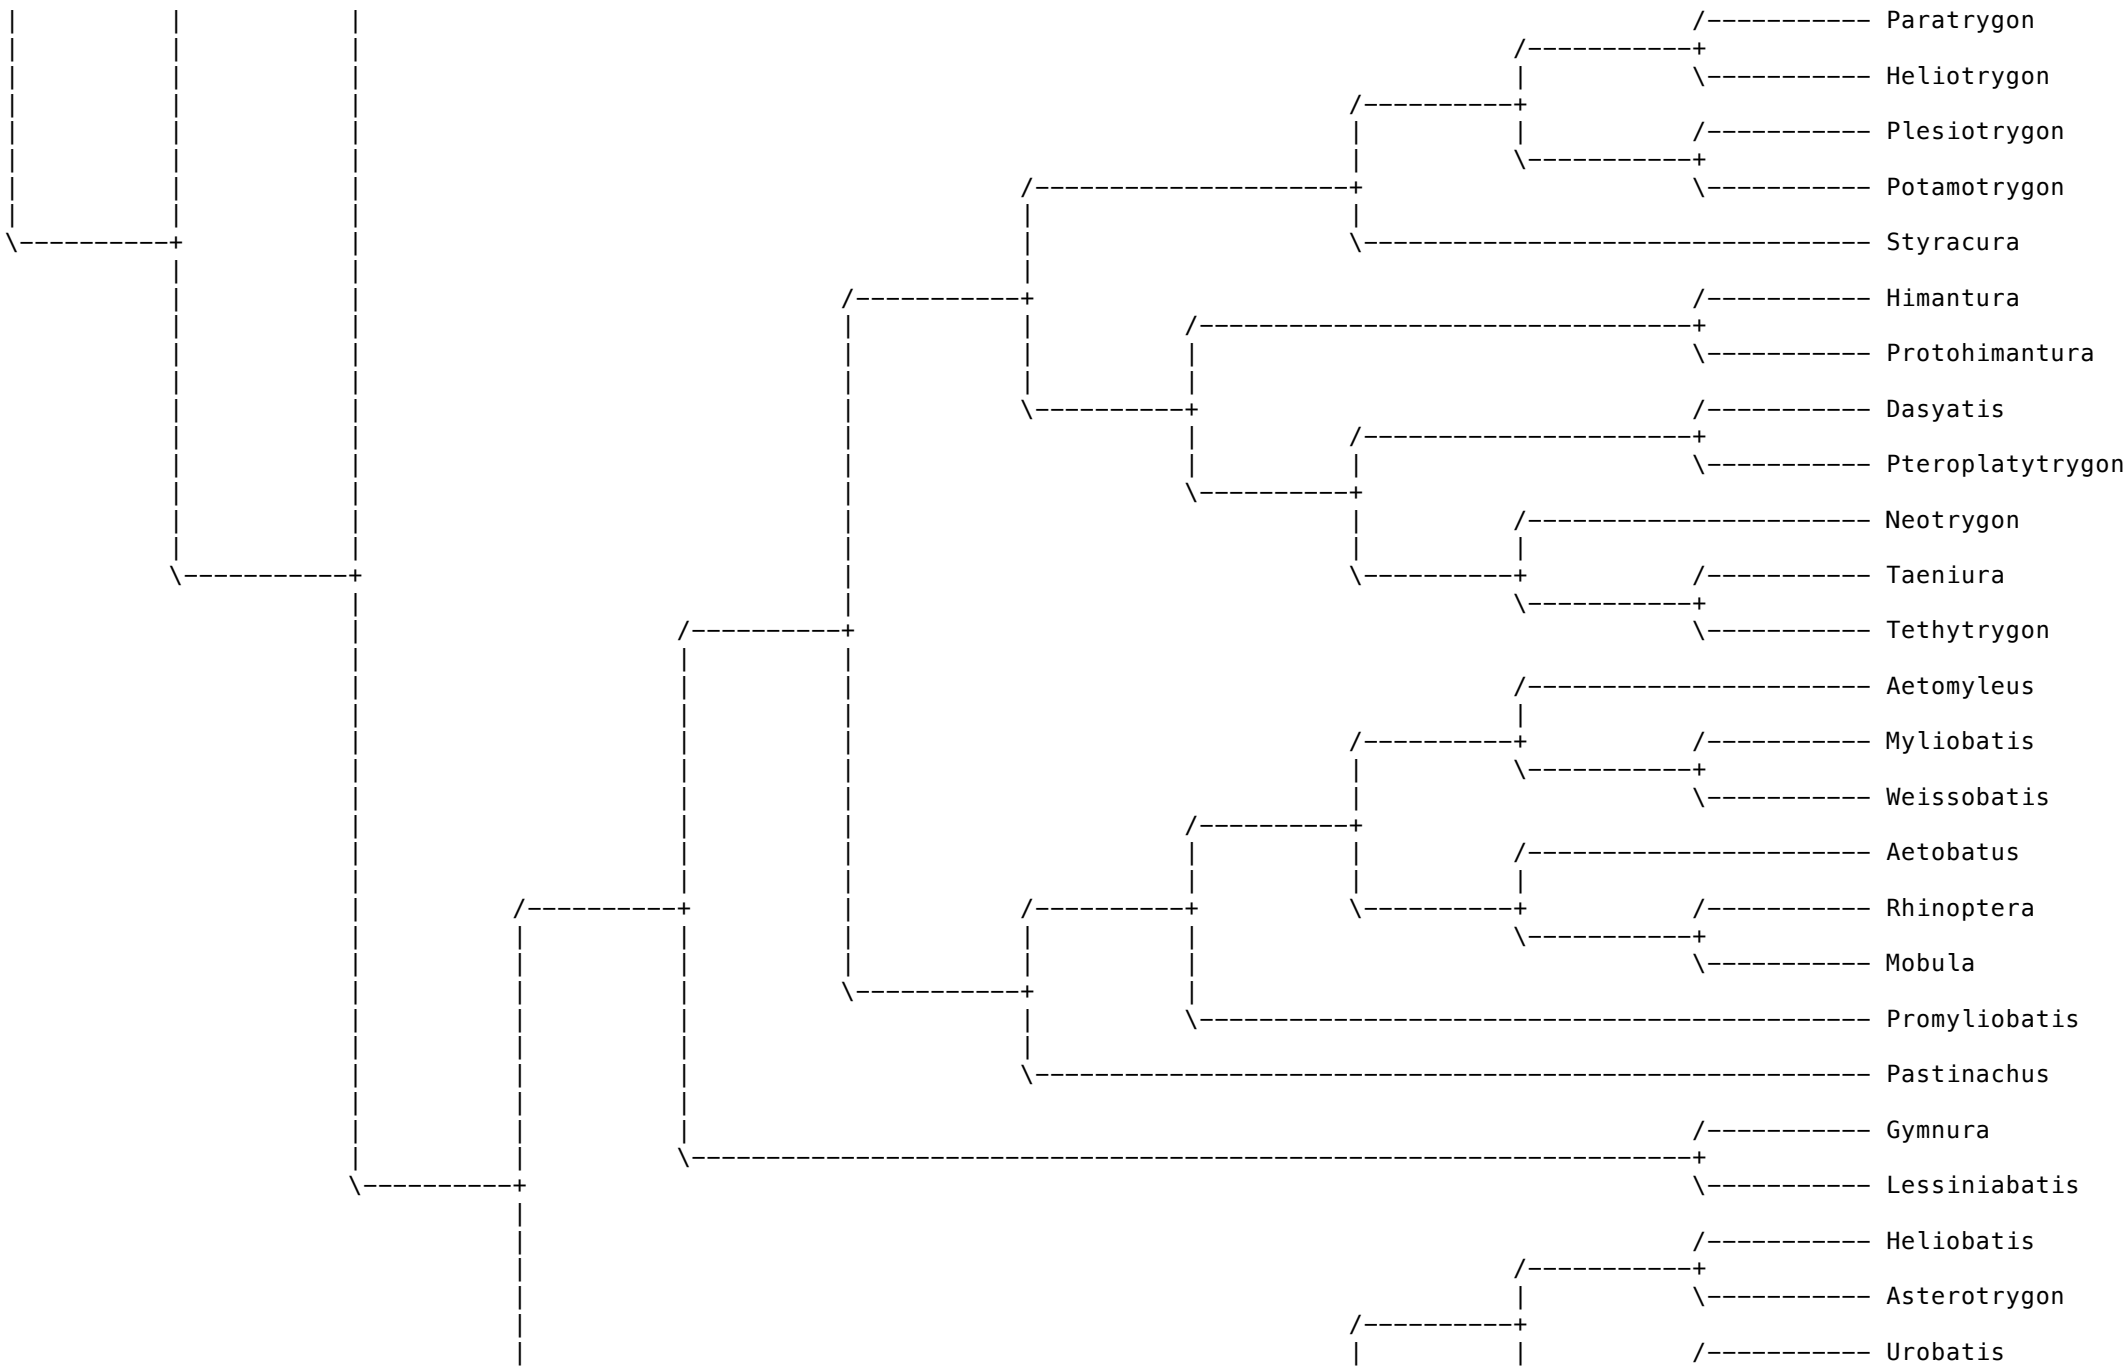

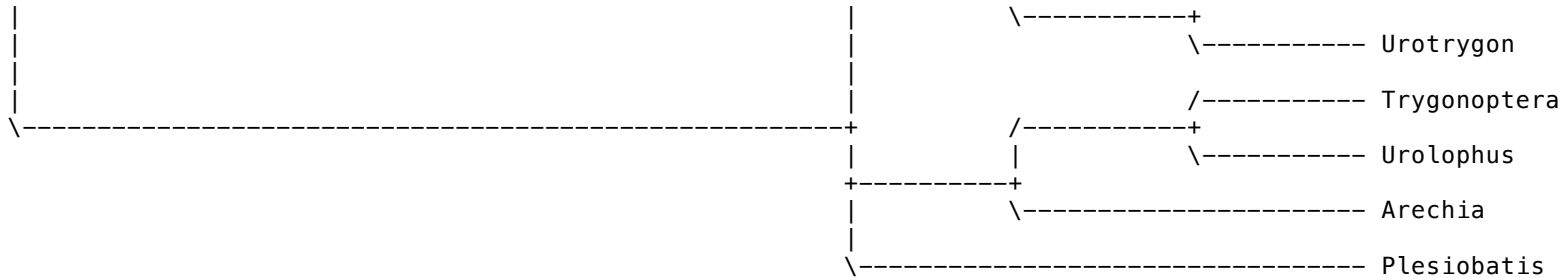

Tree 6 (rooted using user-specified outgroup)

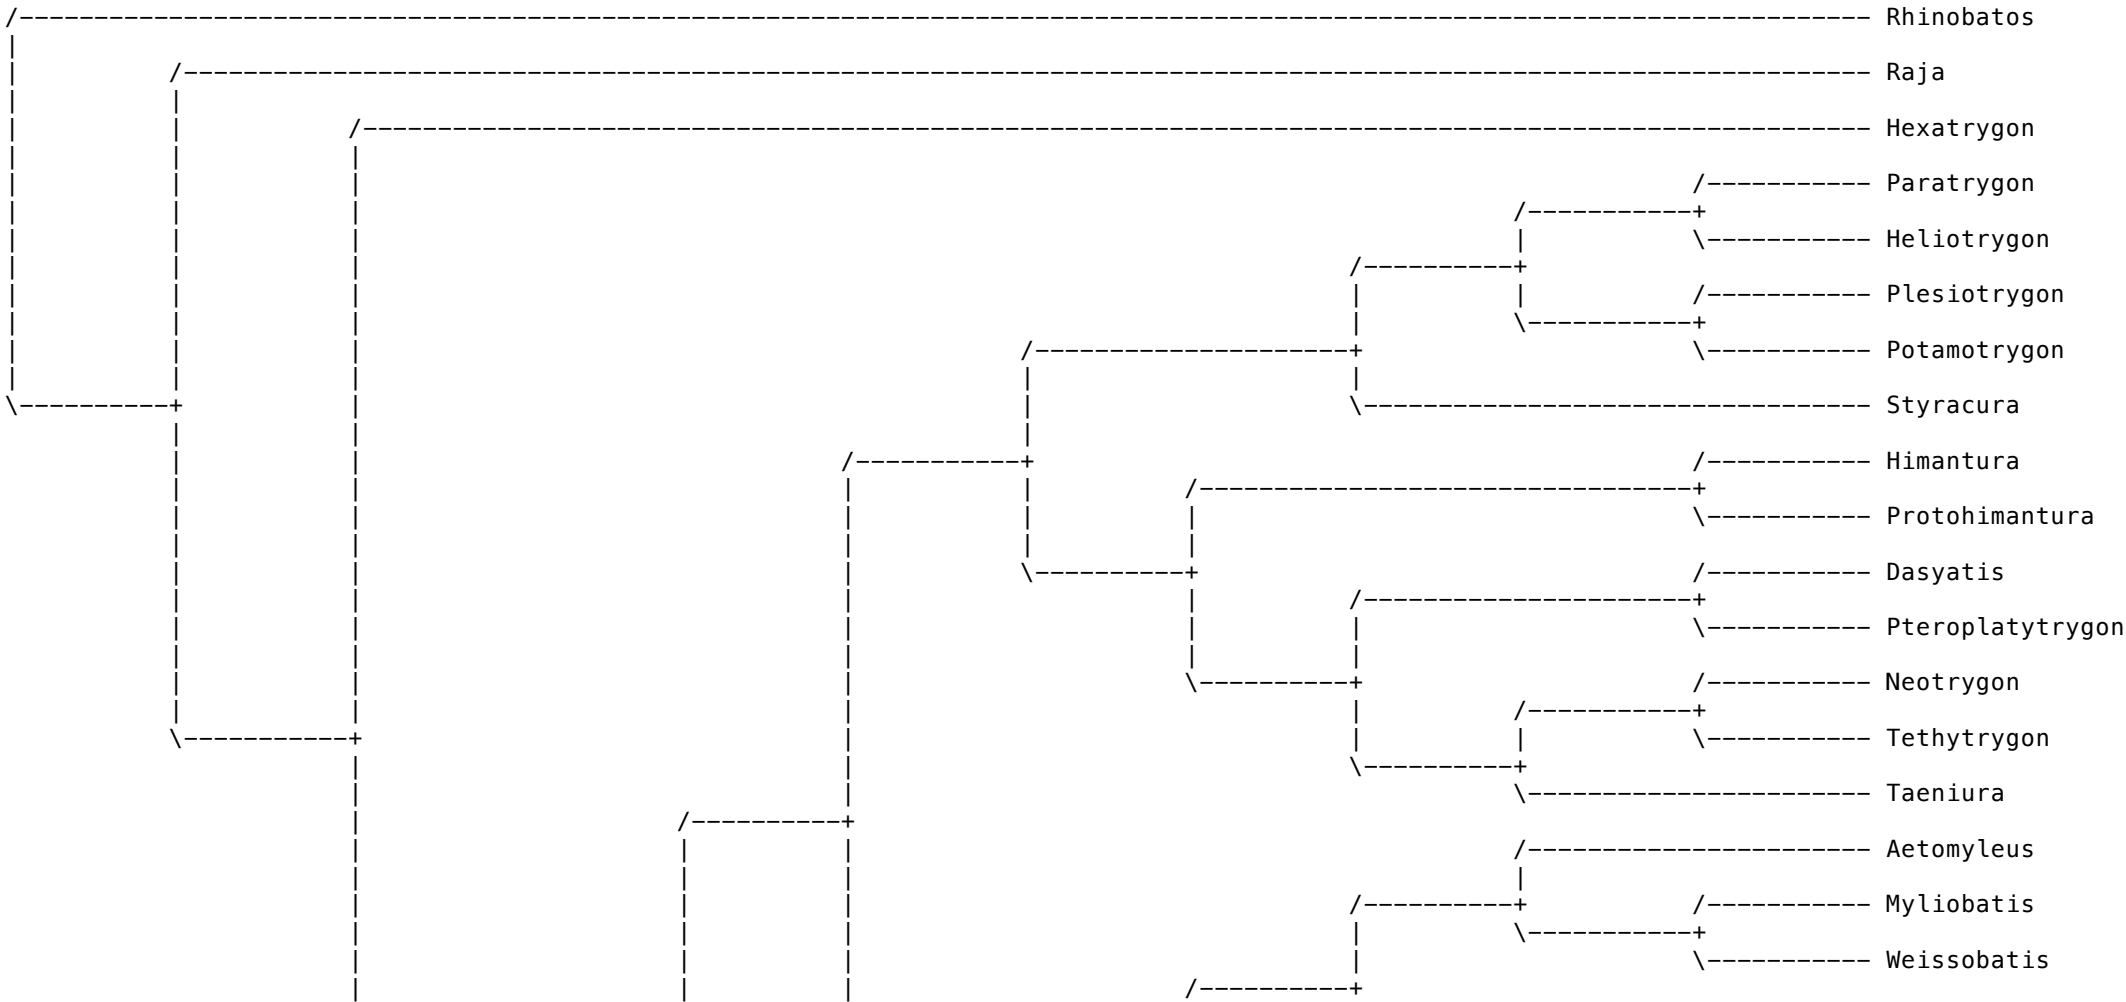



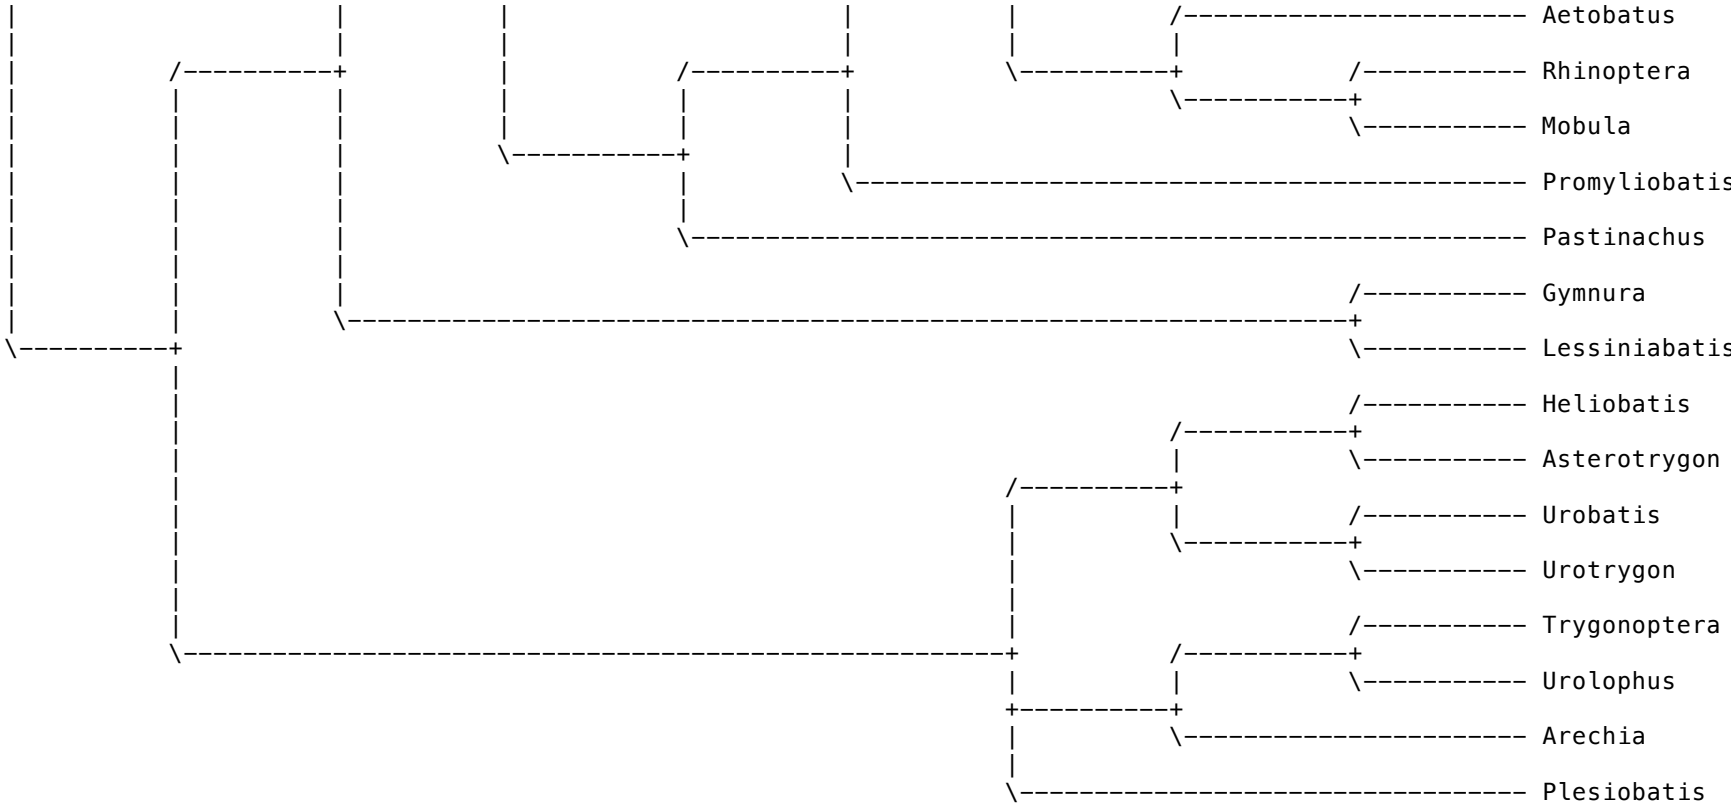

Tree 7 (rooted using user-specified outgroup)

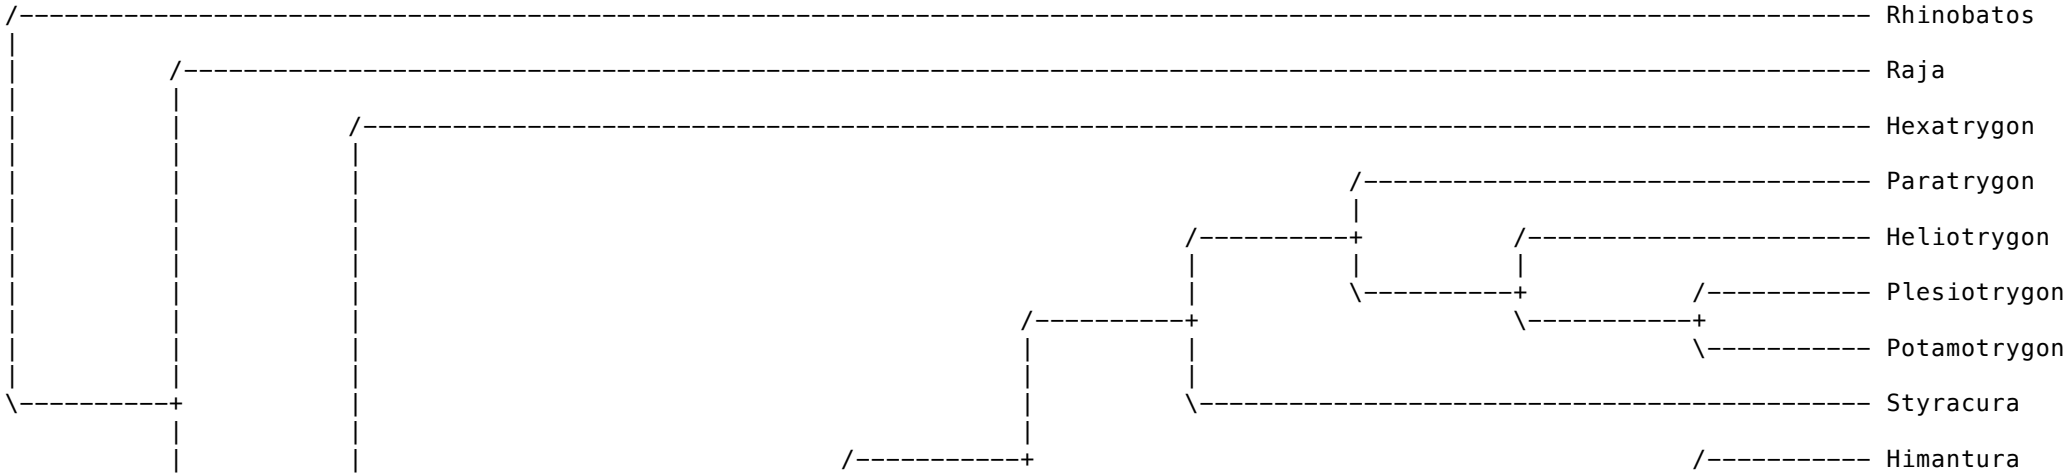

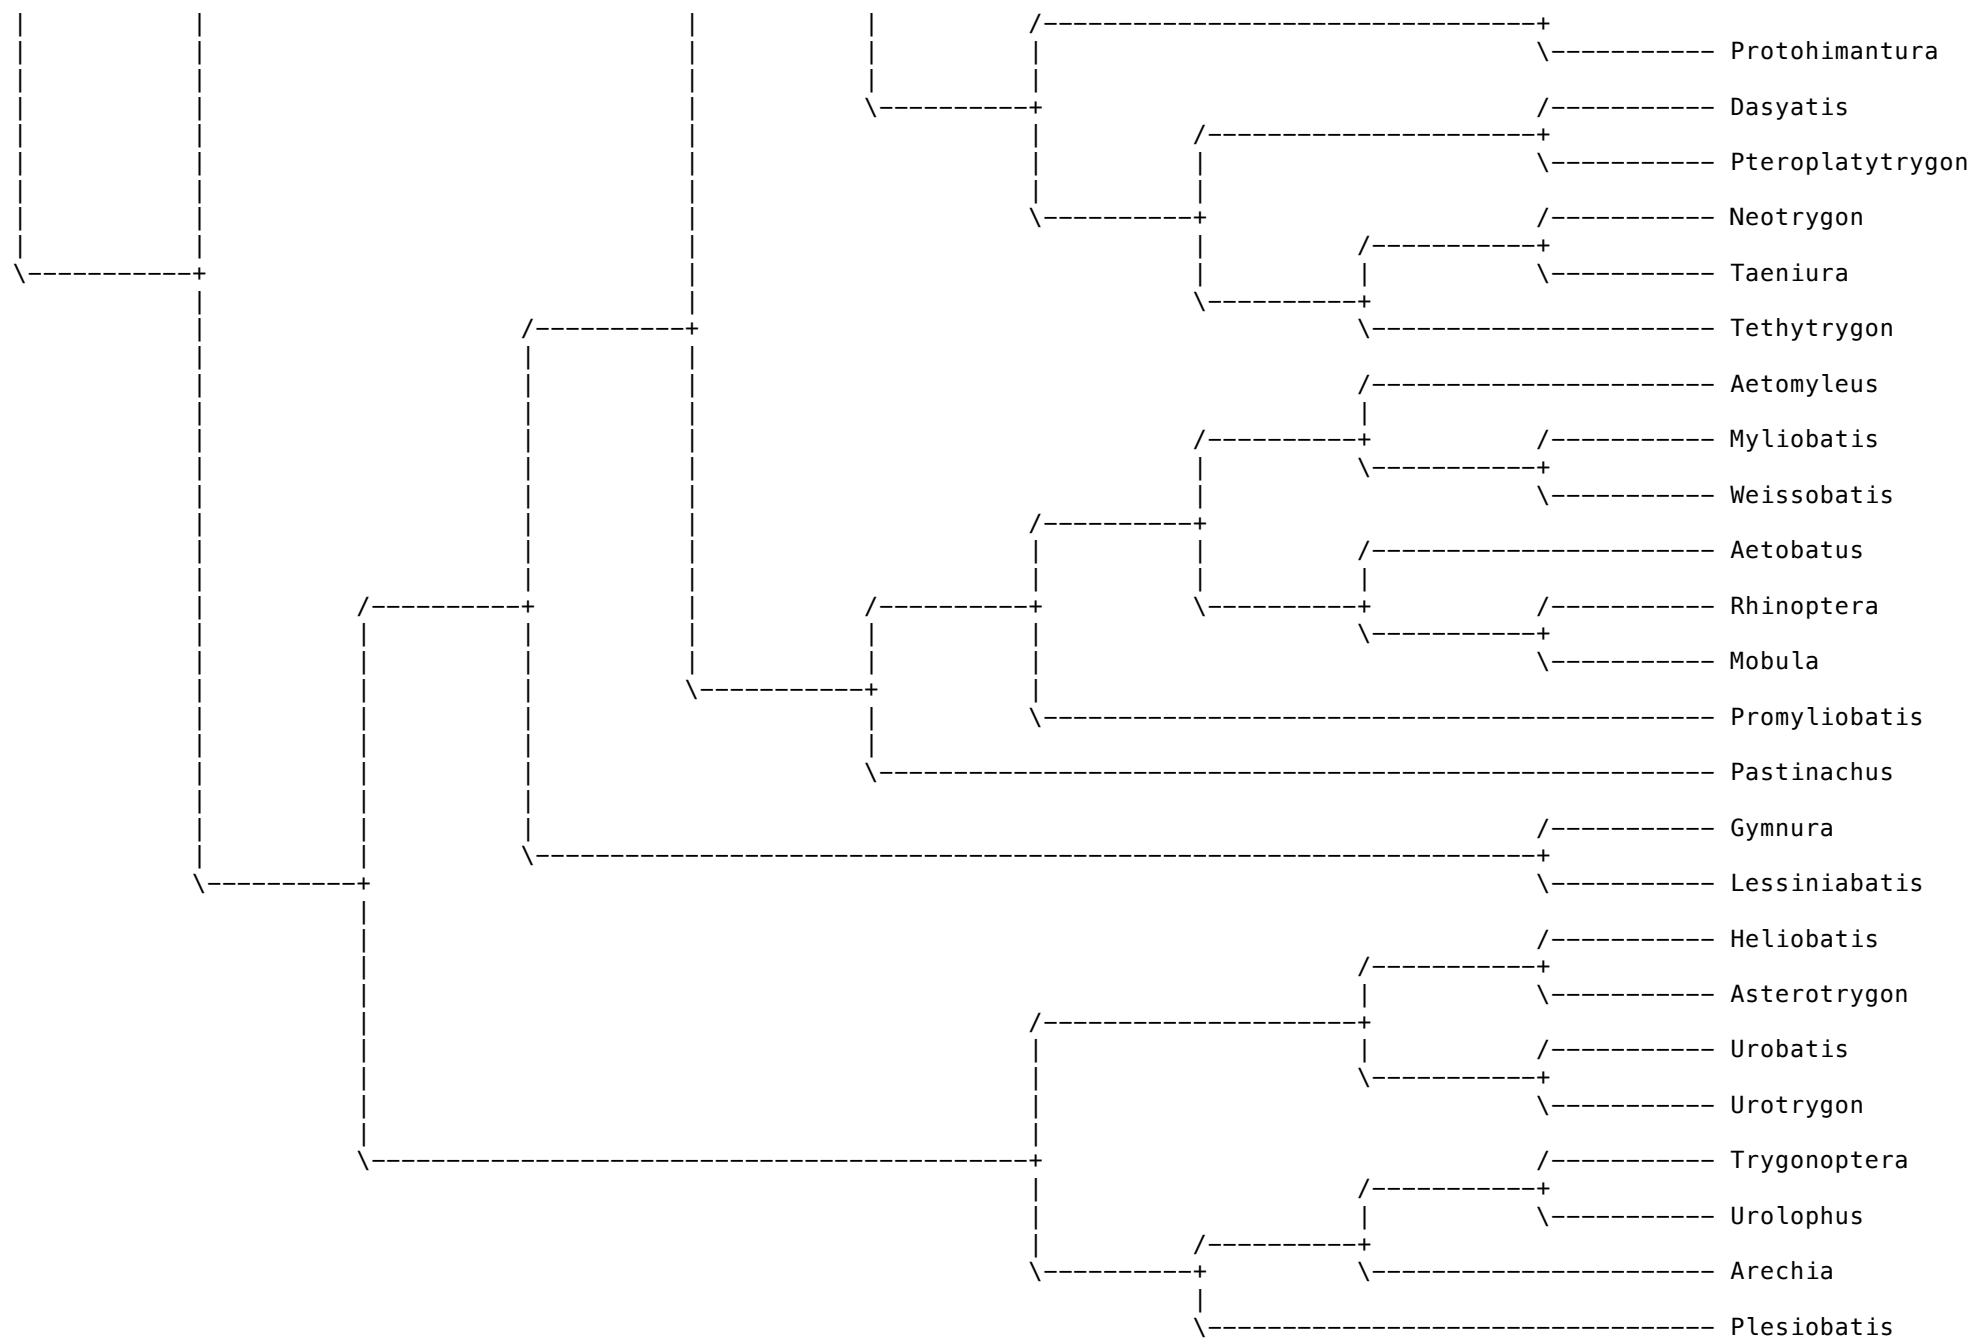

Tree 8 (rooted using user-specified outgroup)

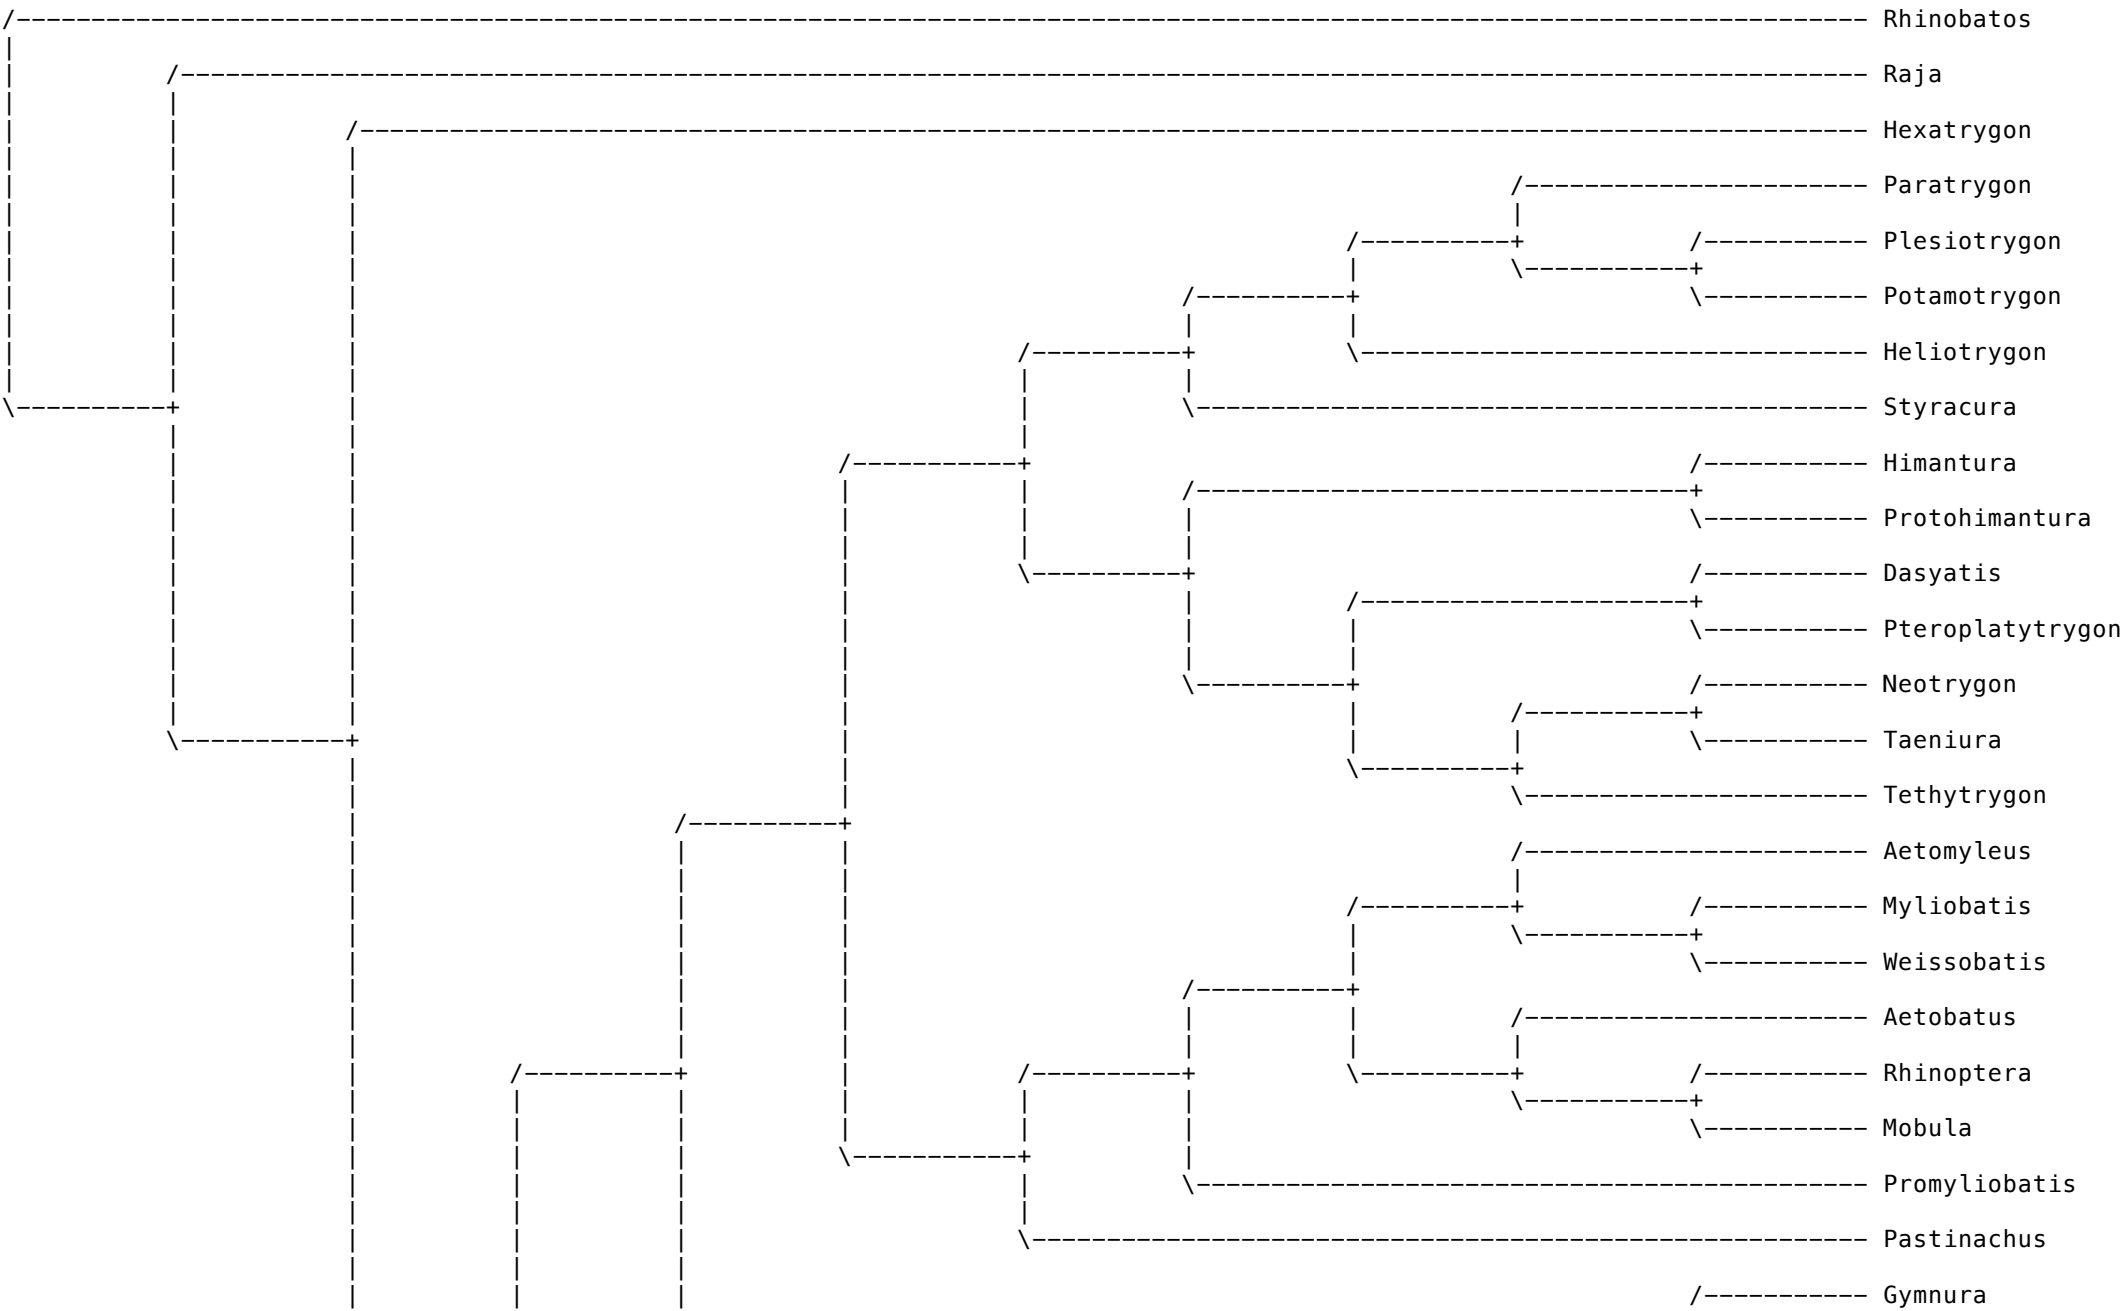

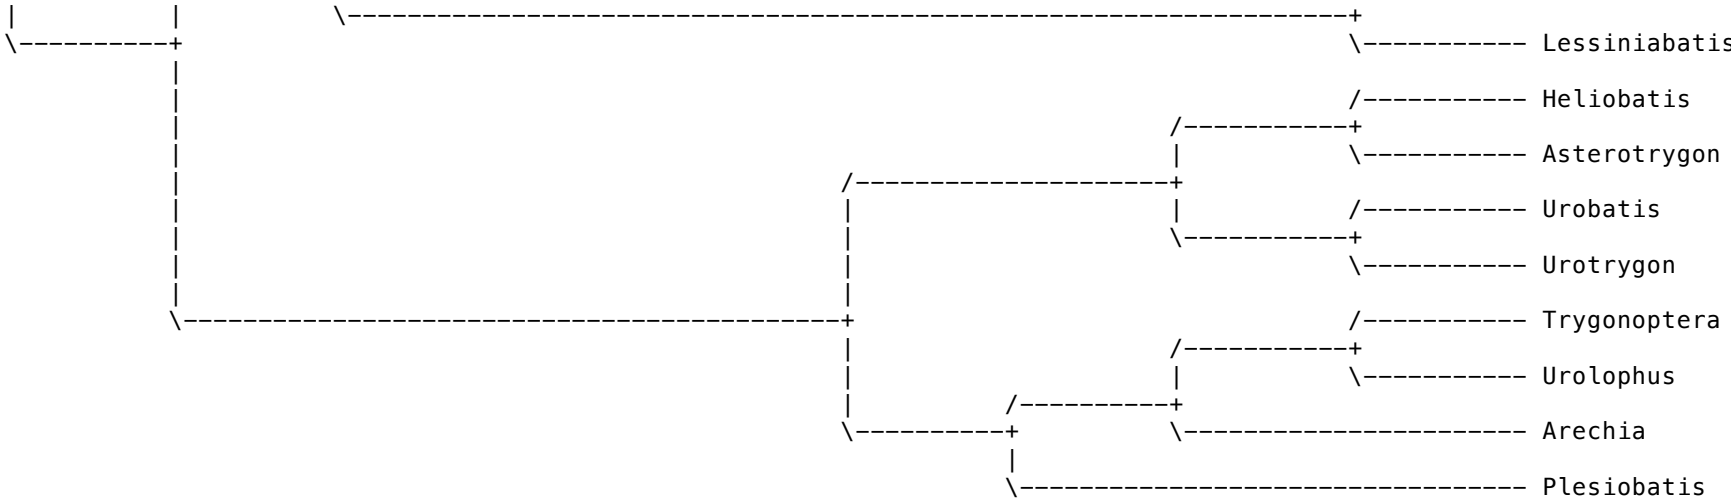

Tree 9 (rooted using user-specified outgroup)

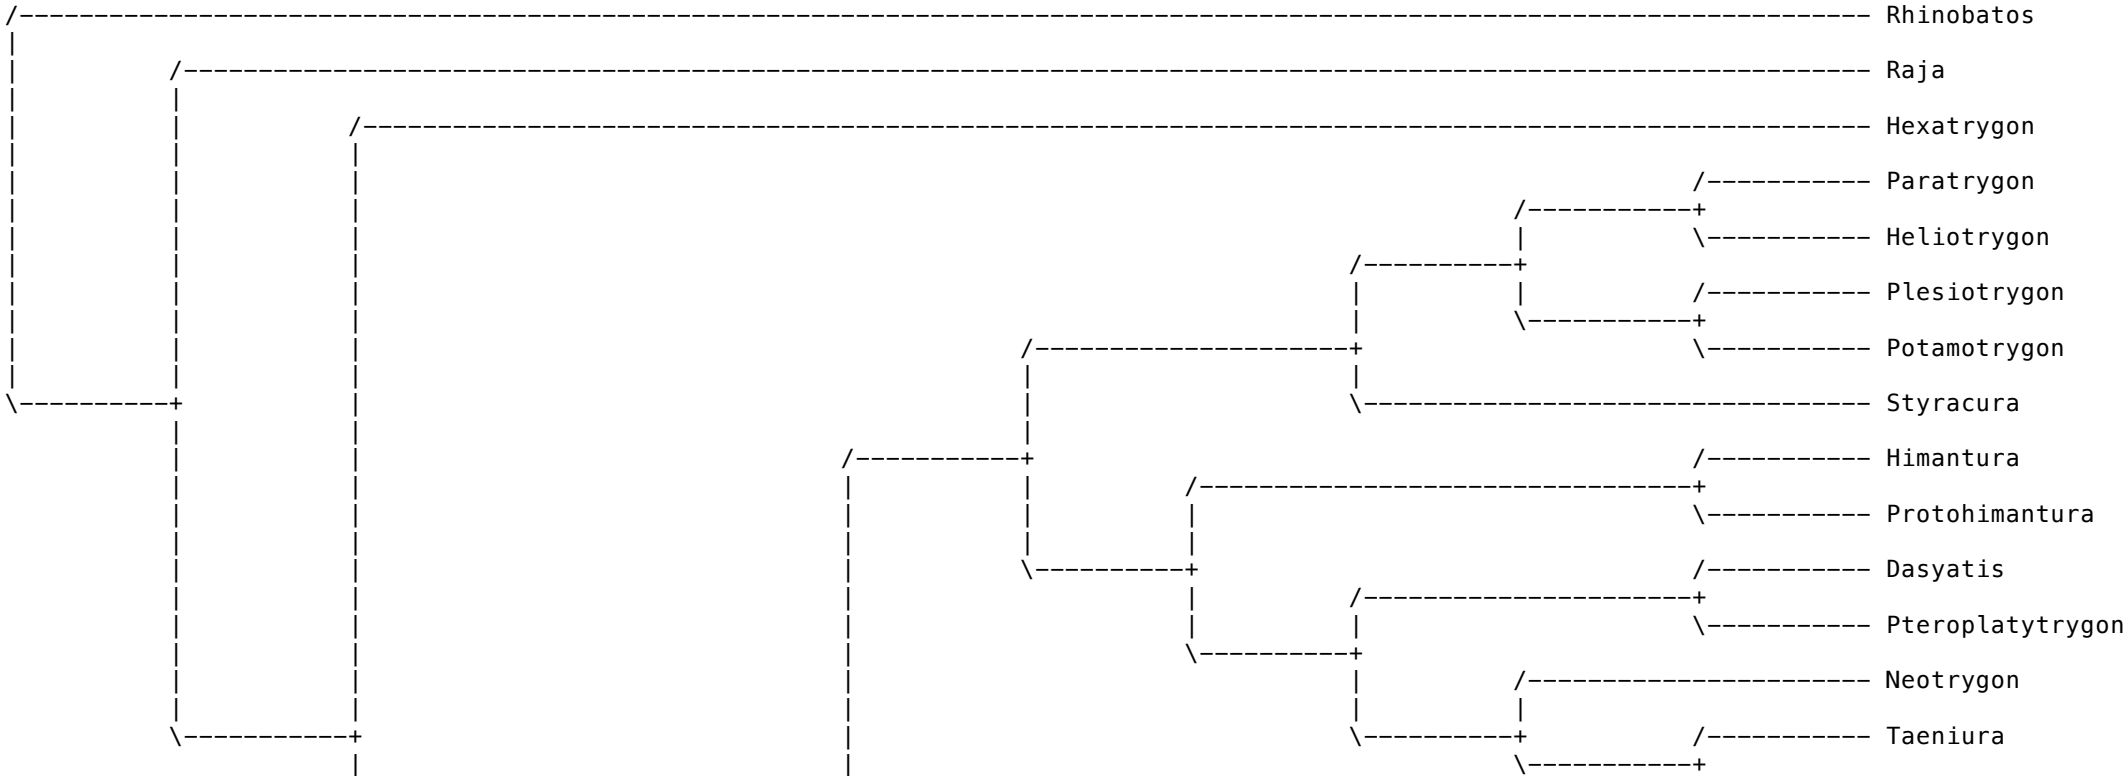

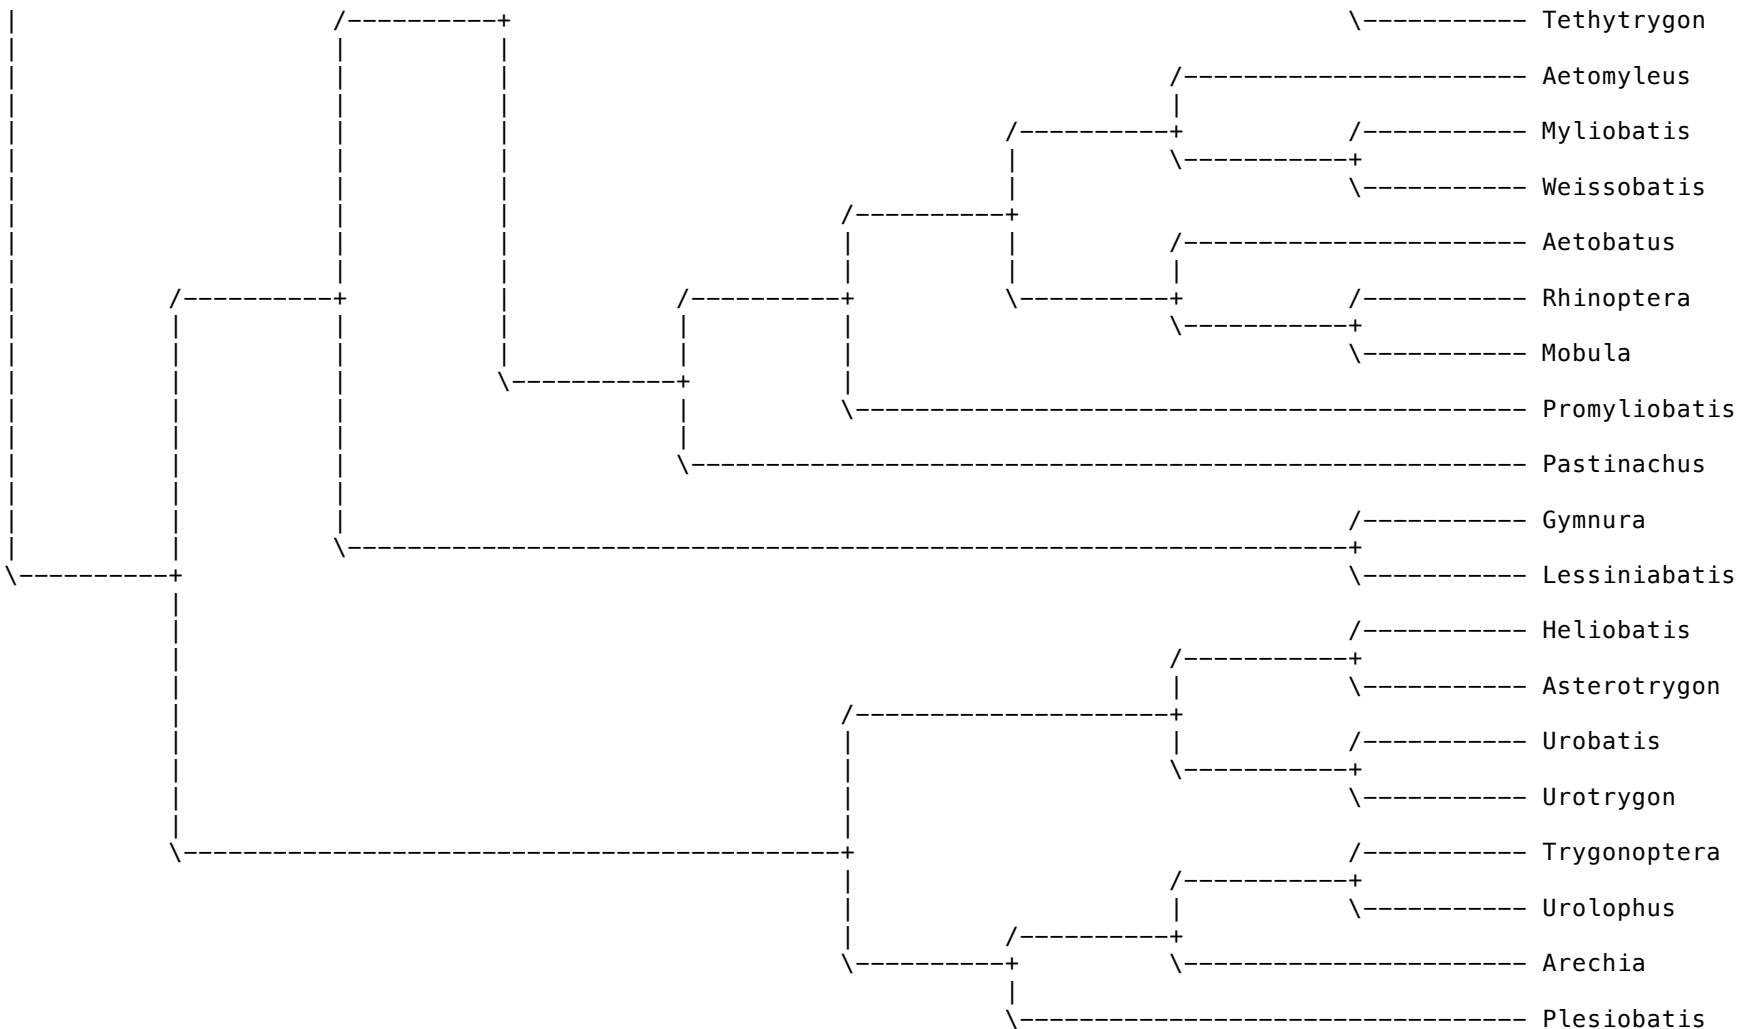

Tree 10 (rooted using user-specified outgroup)

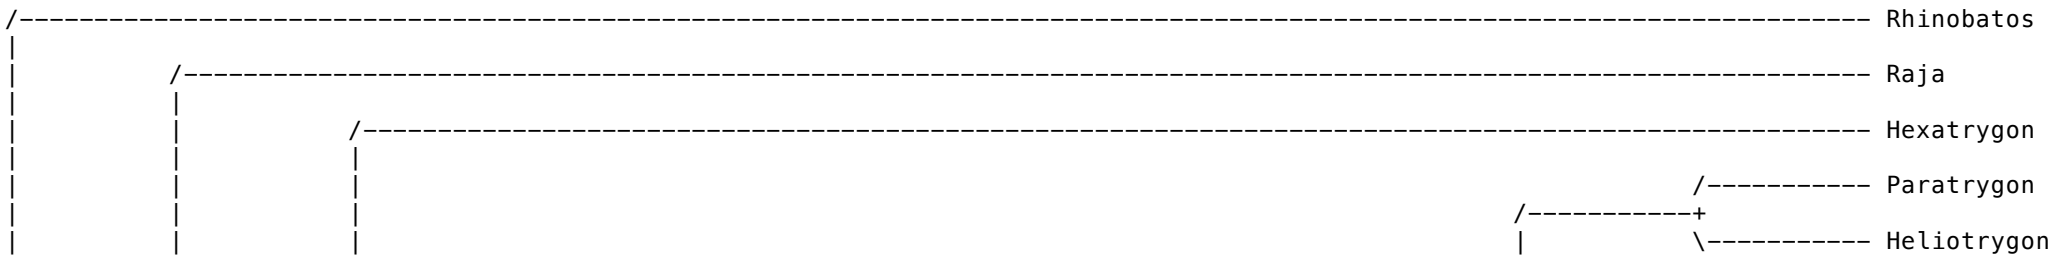

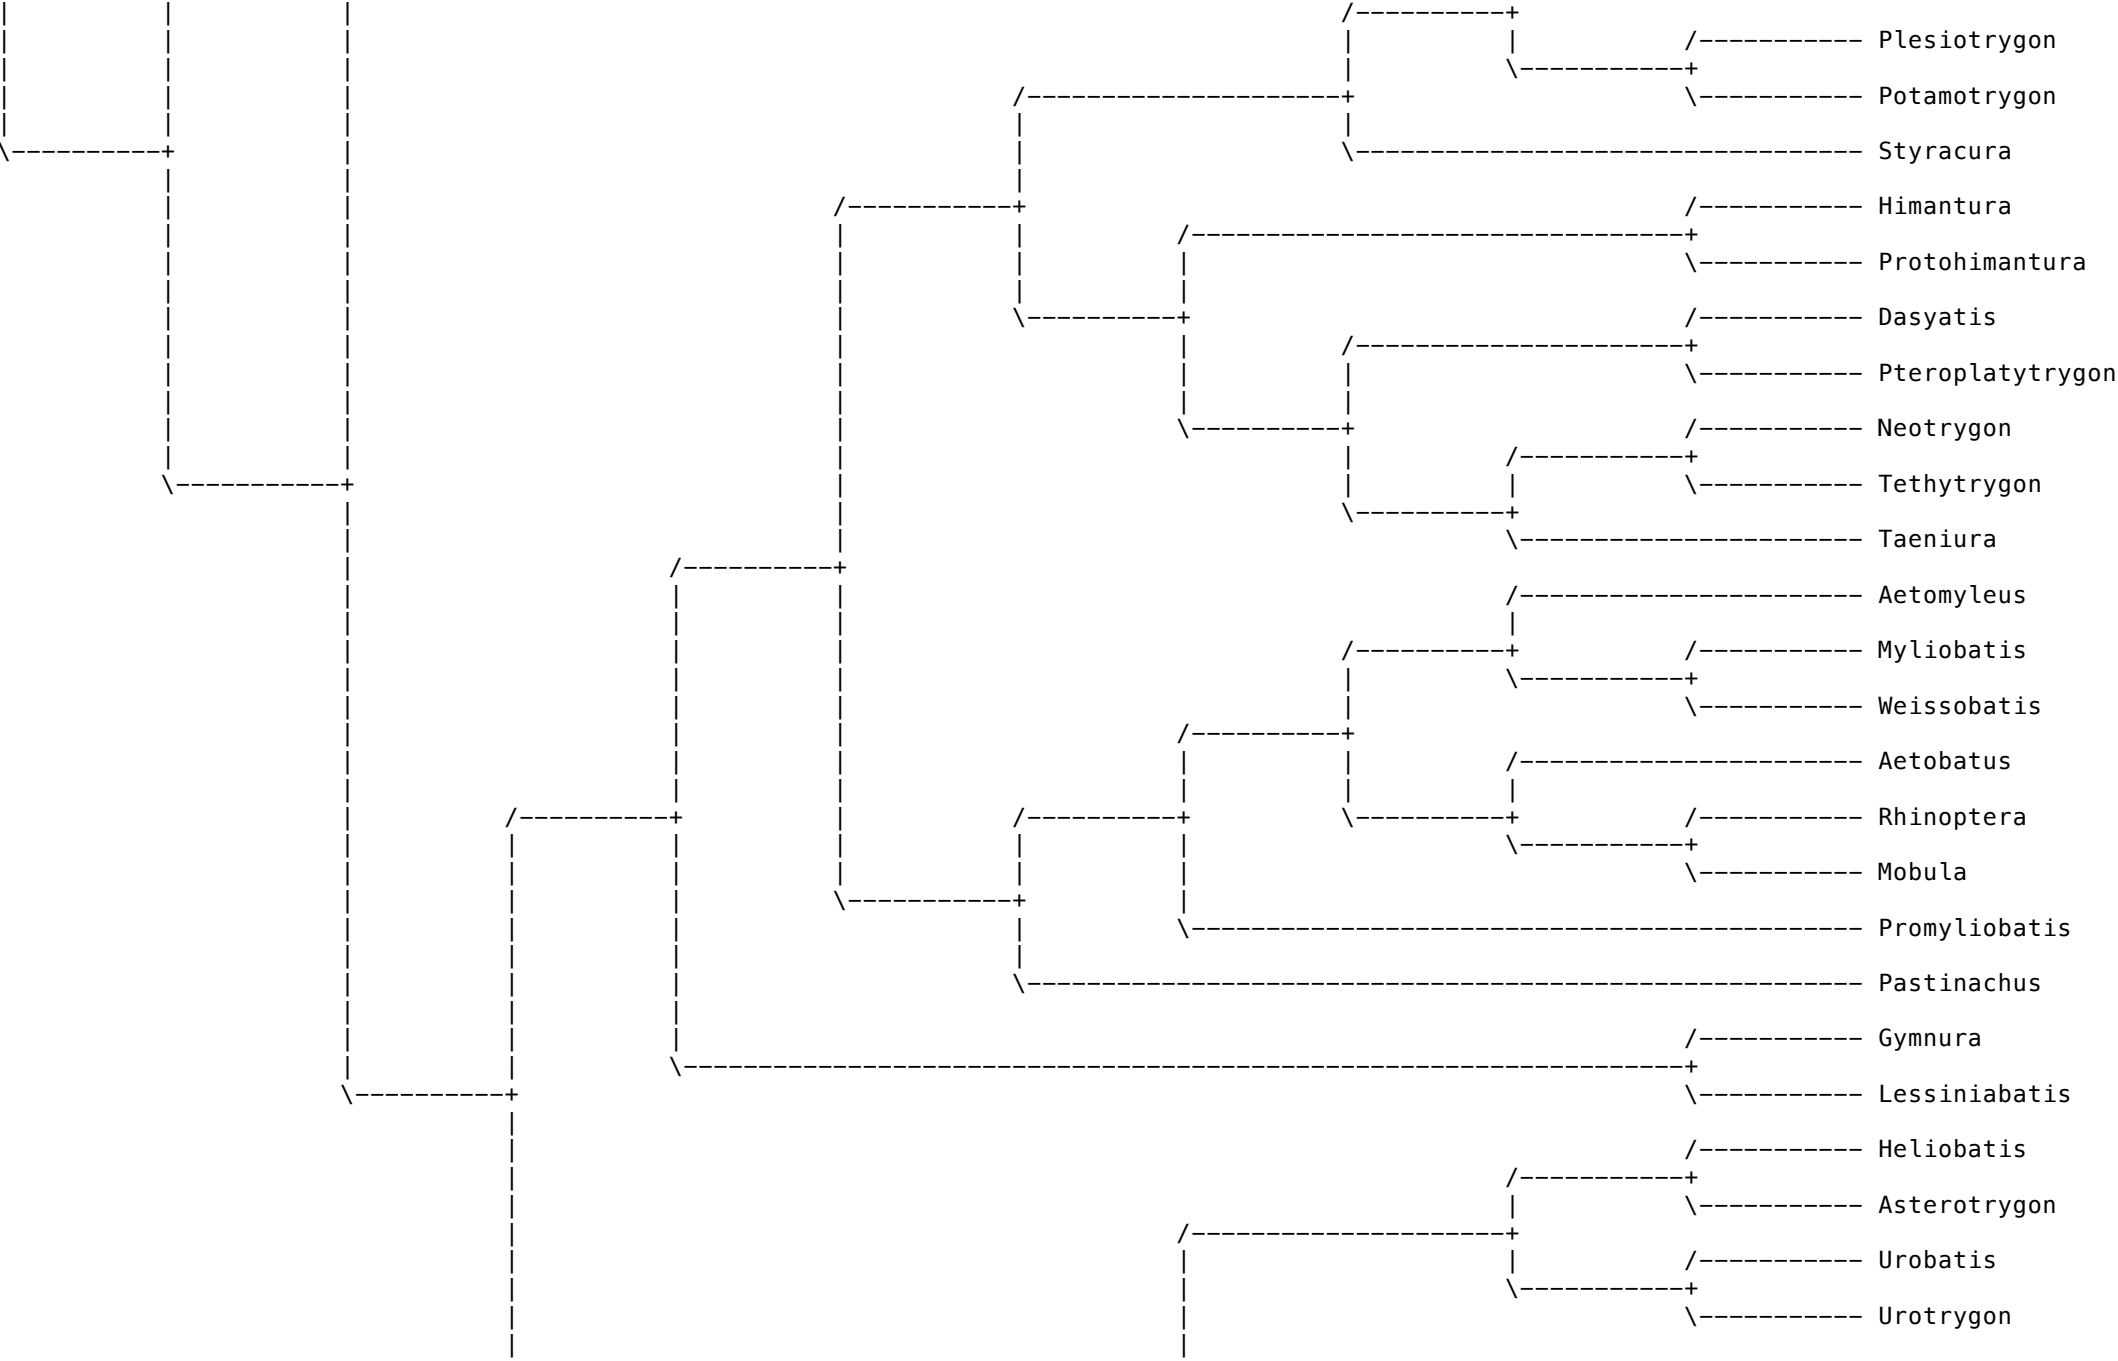

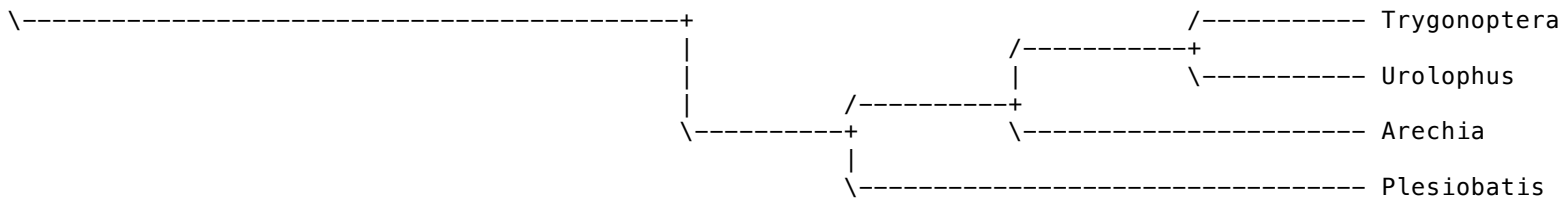

Tree 11 (rooted using user-specified outgroup)

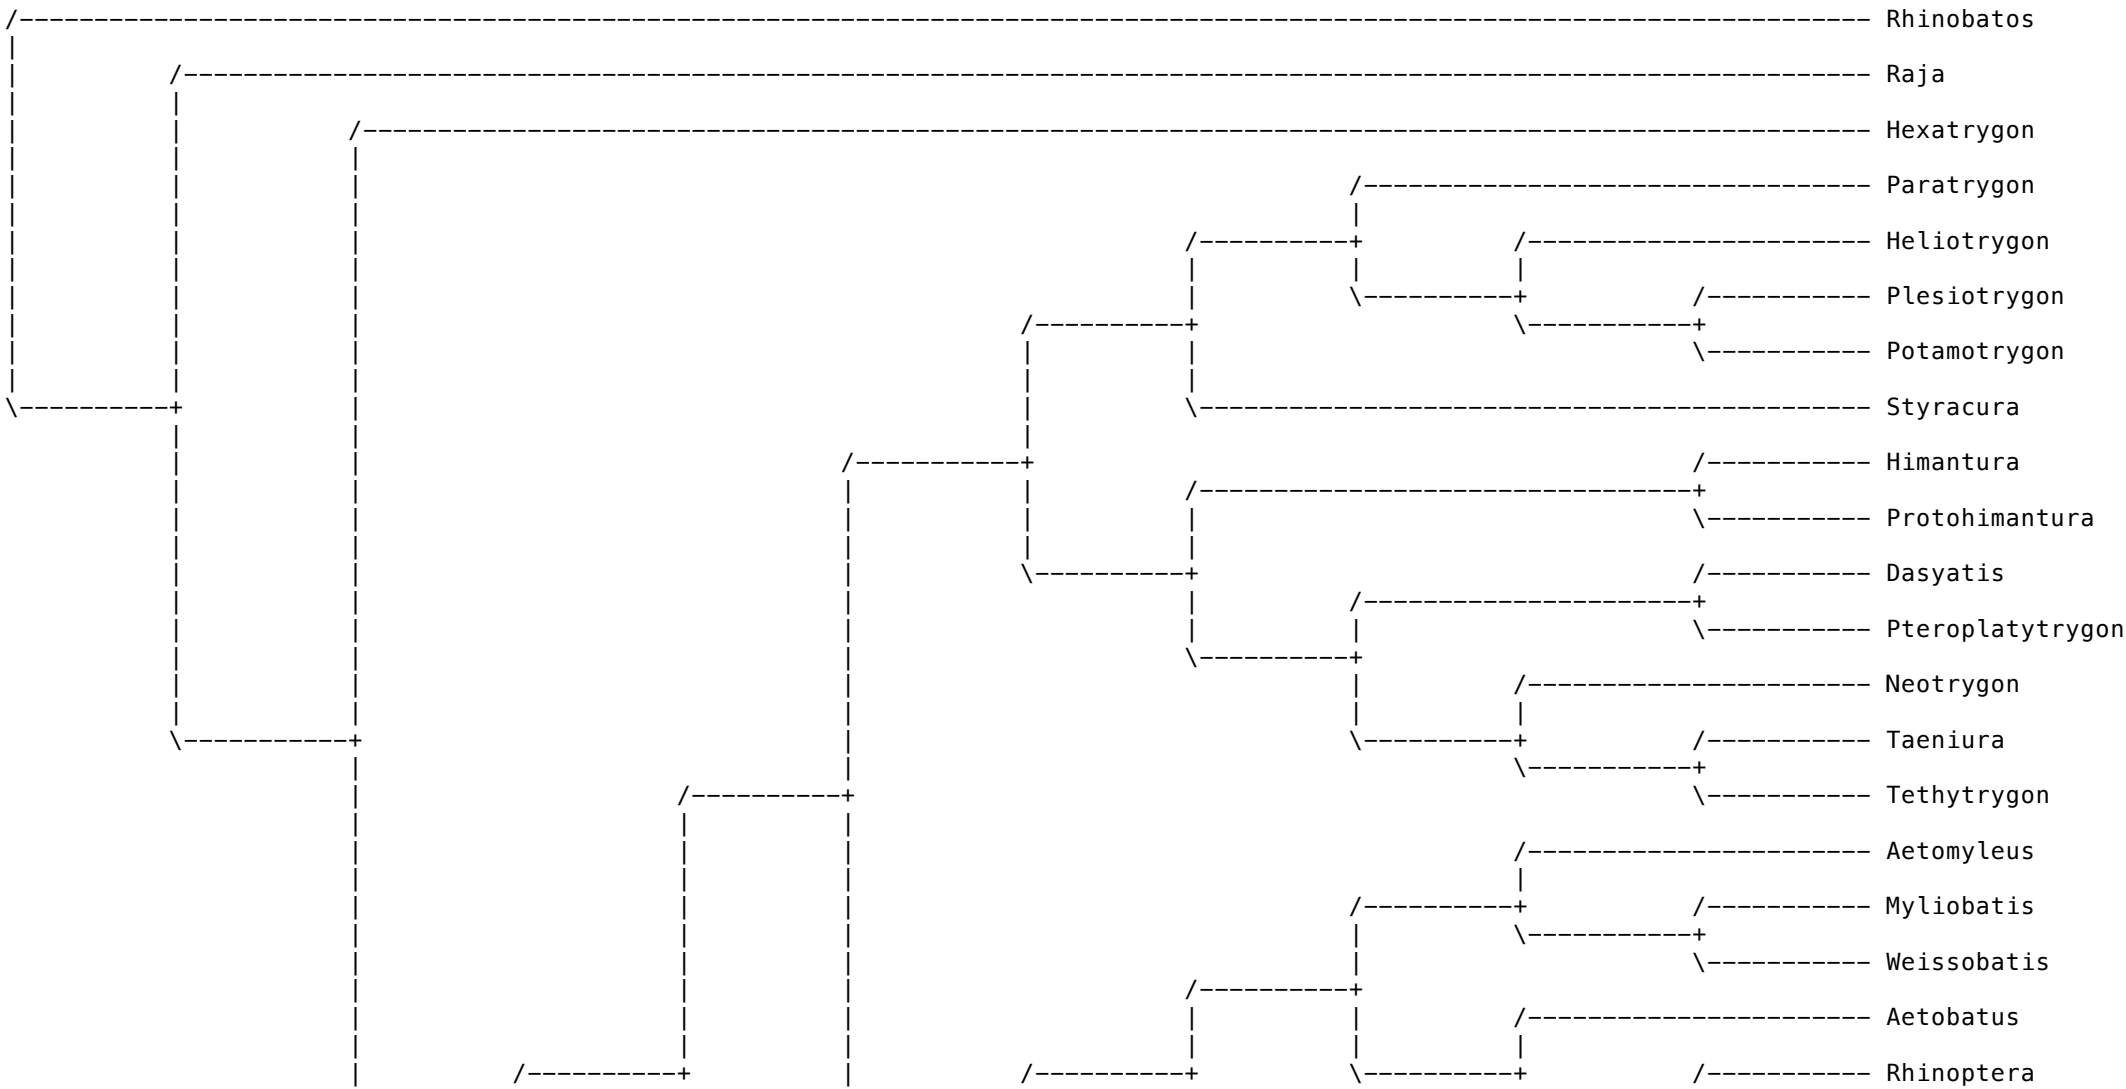

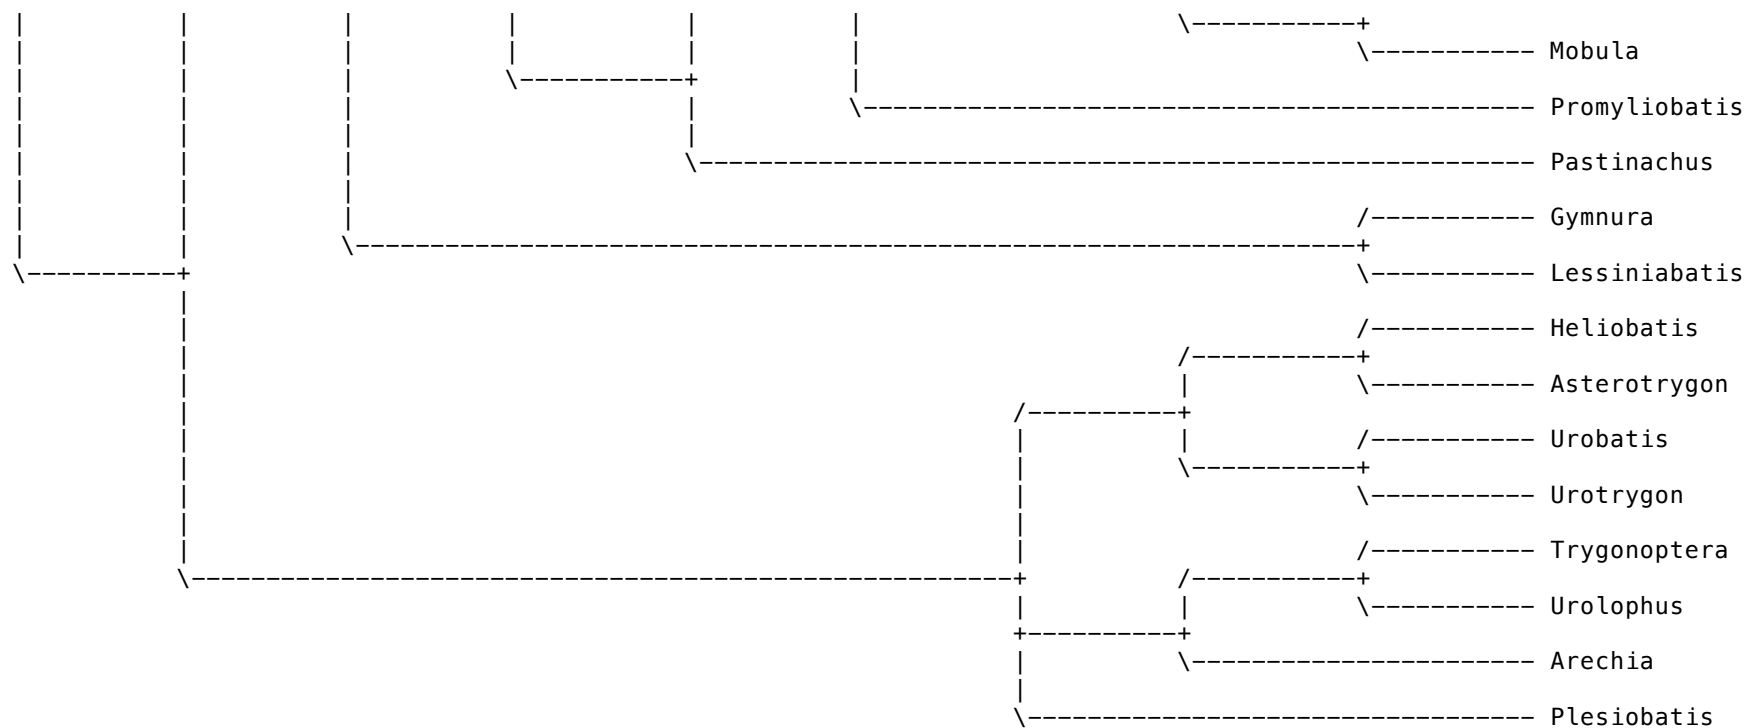

Tree 12 (rooted using user-specified outgroup)

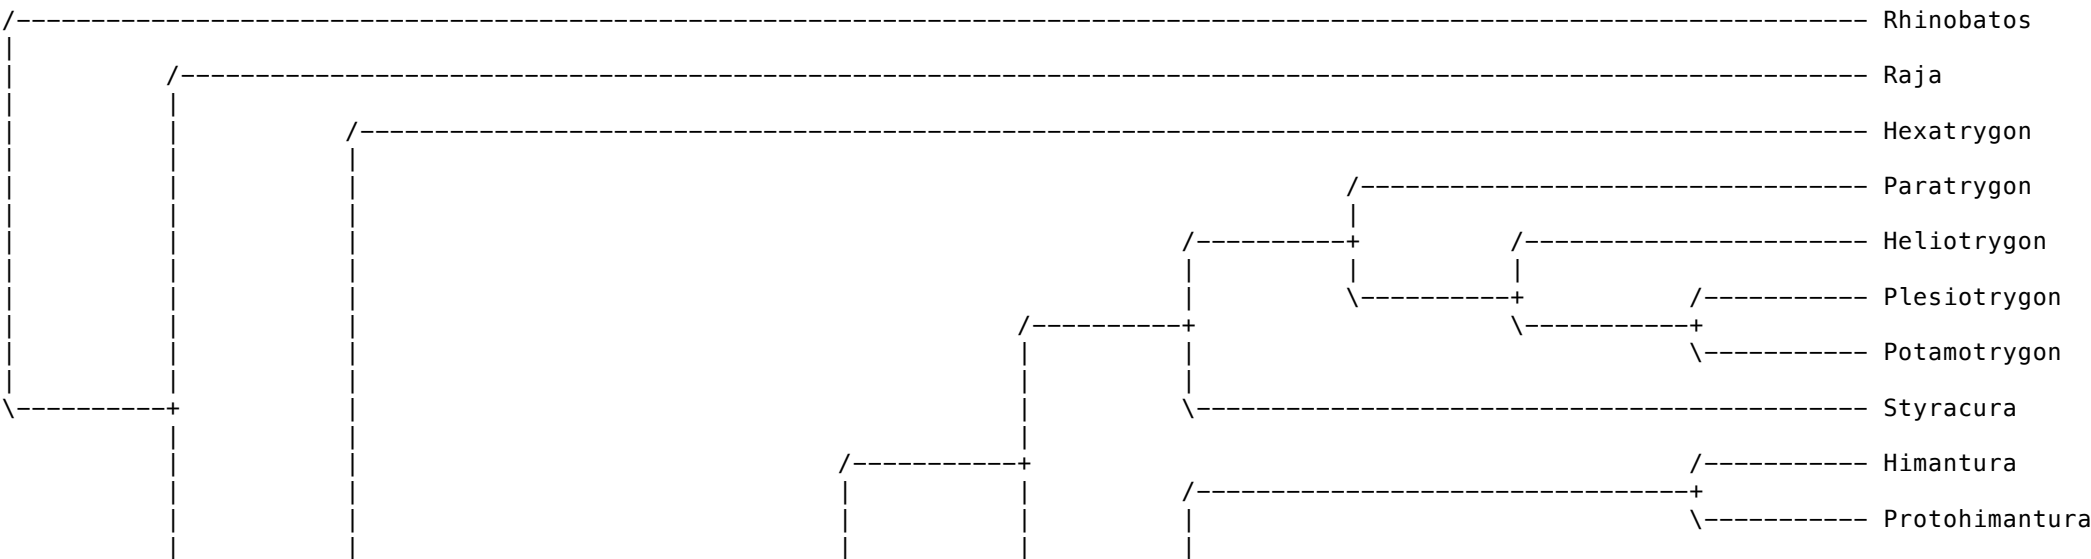



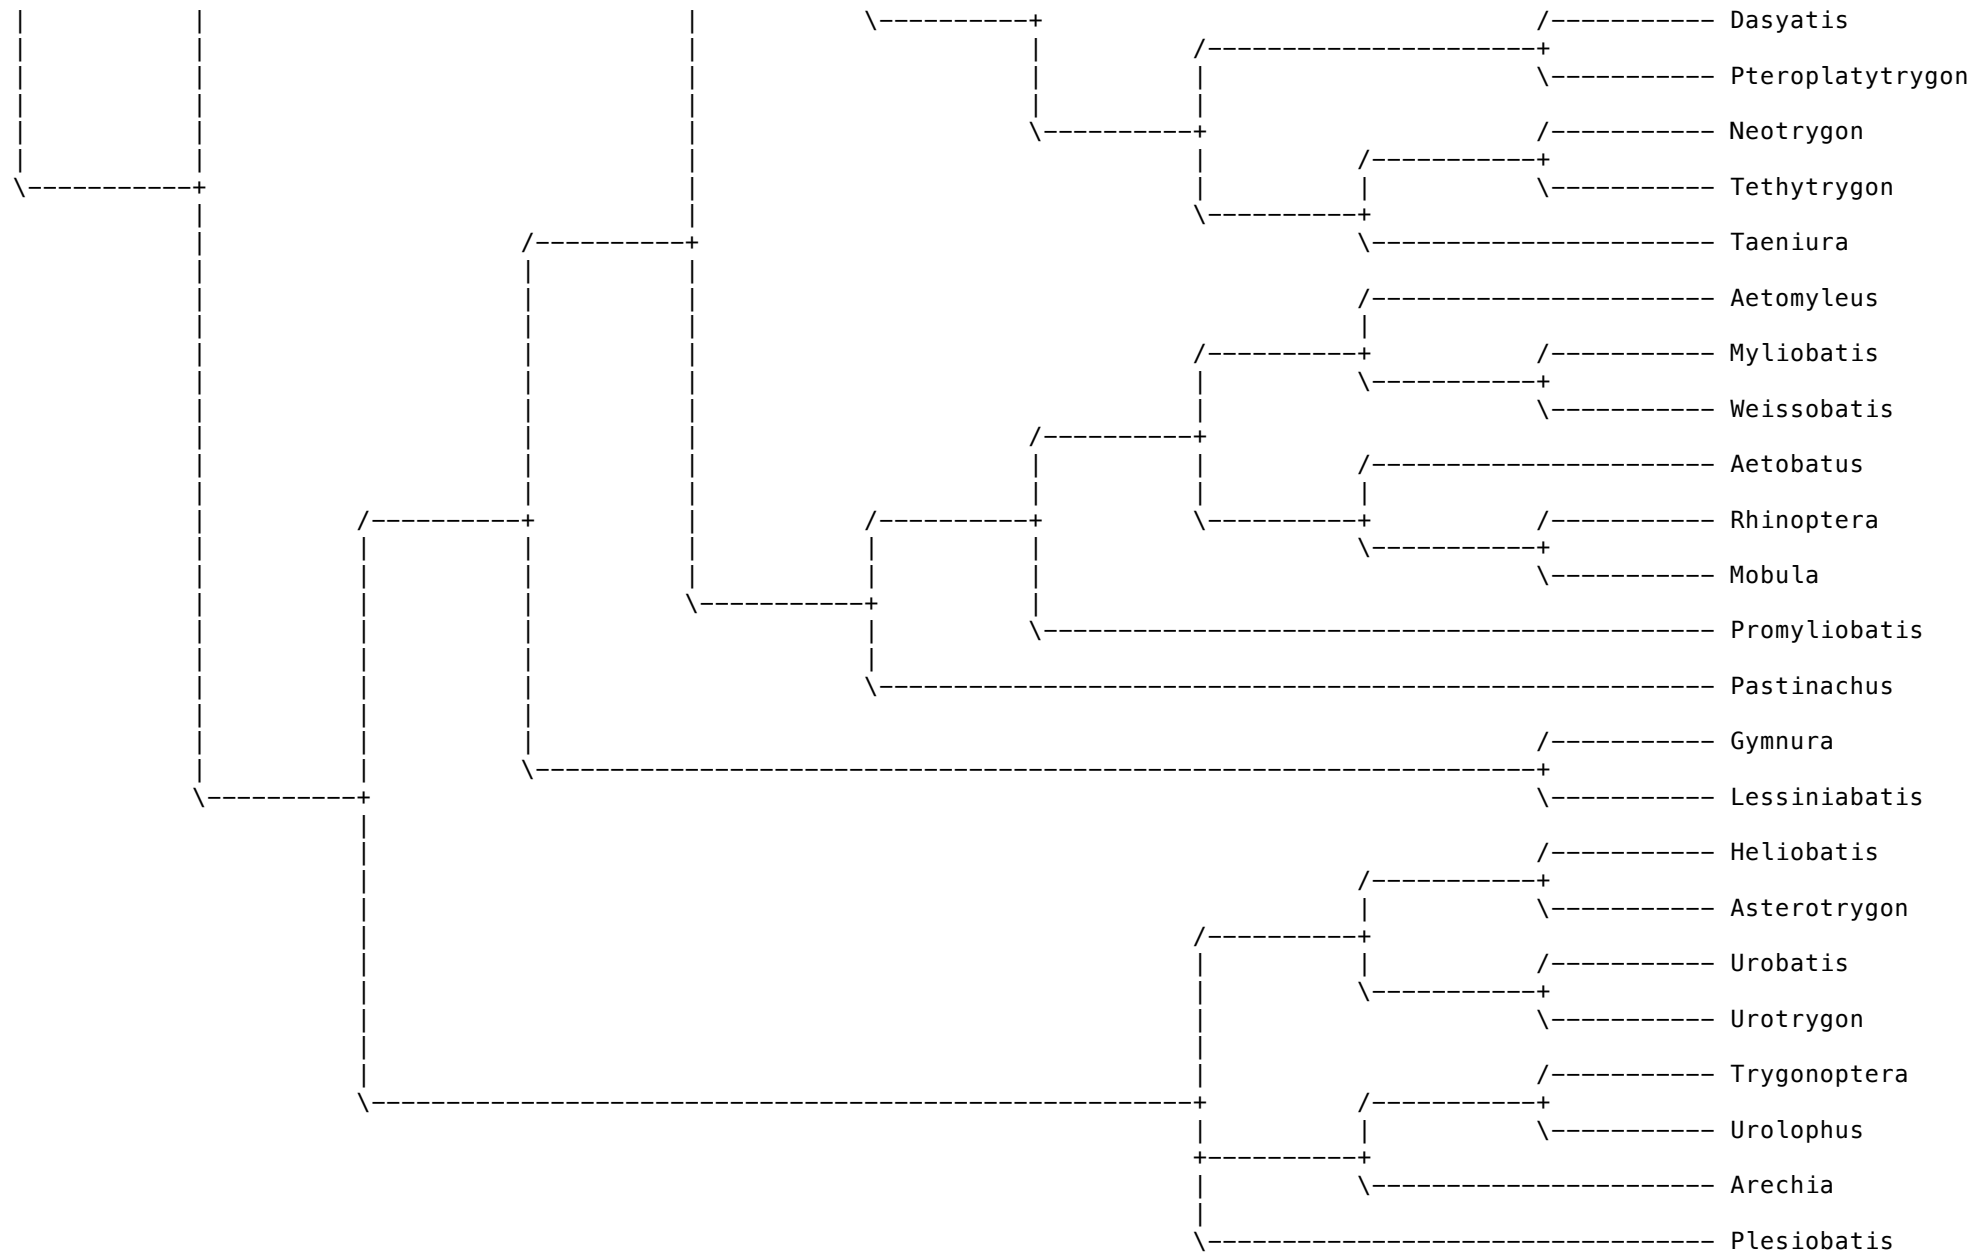

Tree 13 (rooted using user-specified outgroup)

/----- Rhinobatos

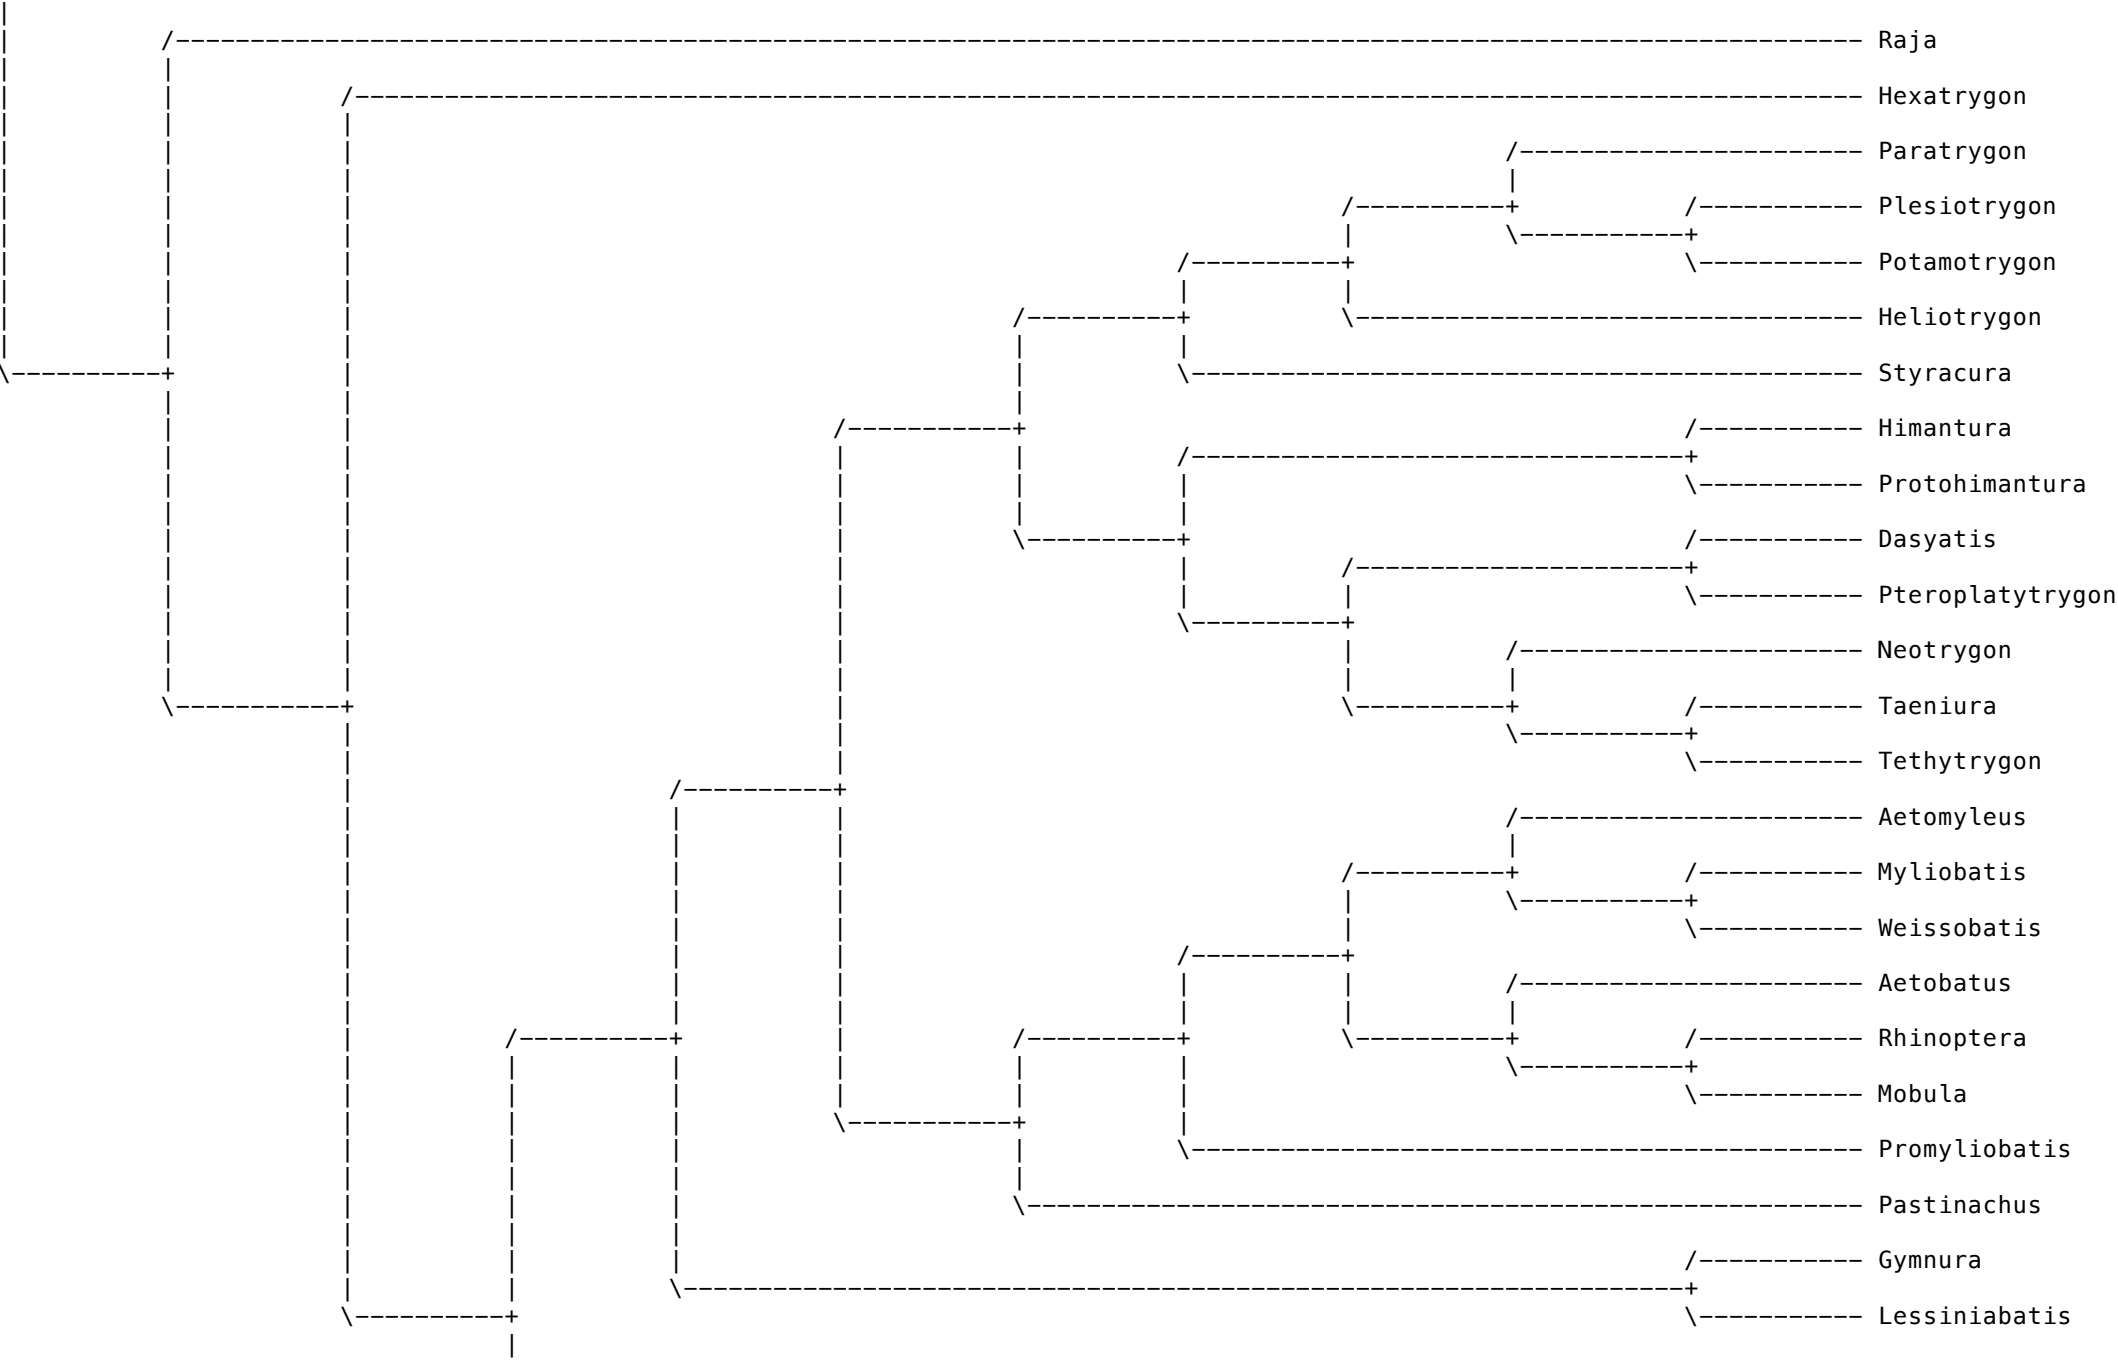

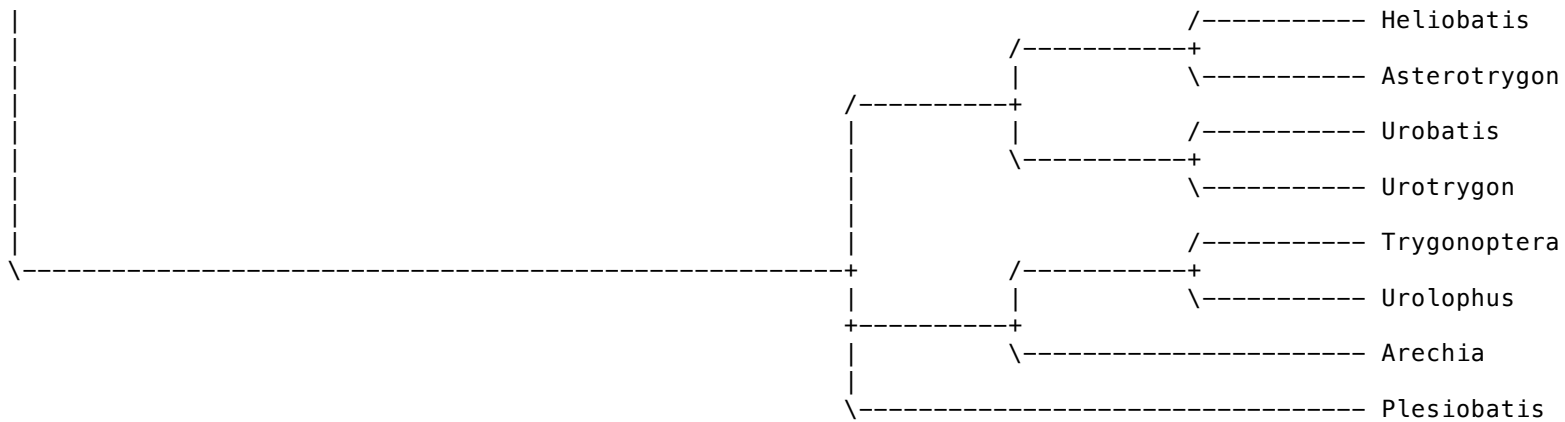

Tree 14 (rooted using user-specified outgroup)

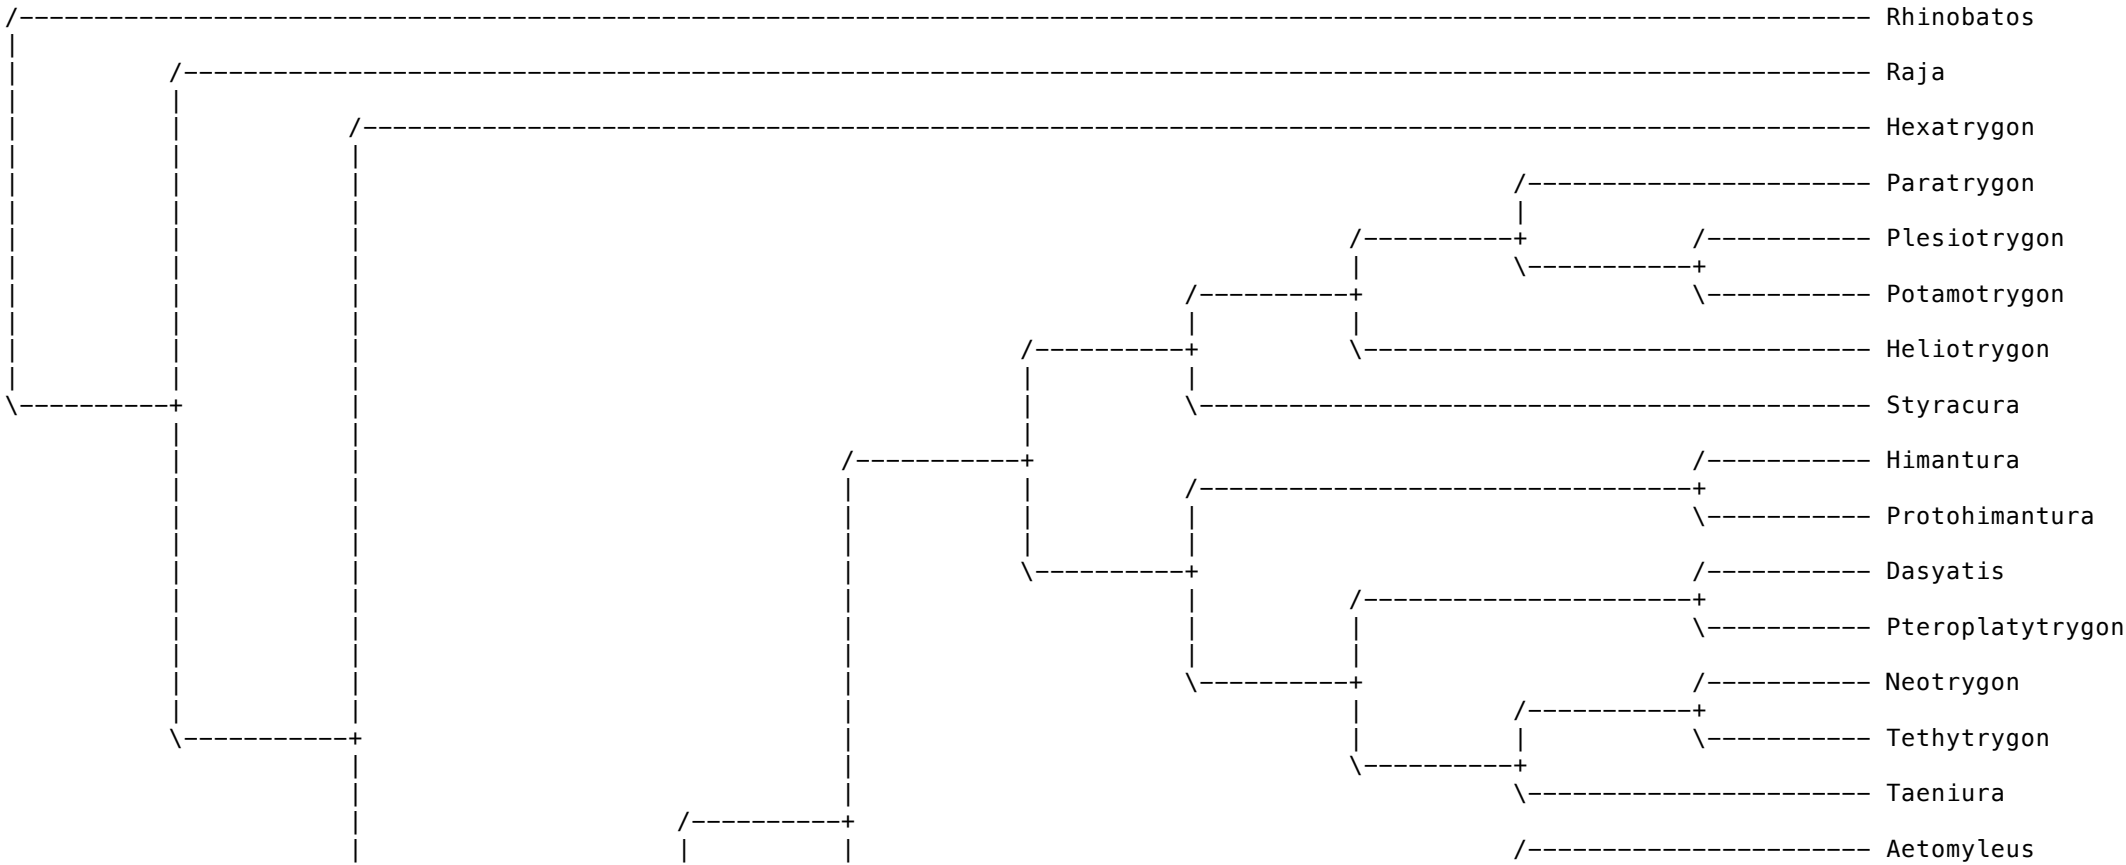

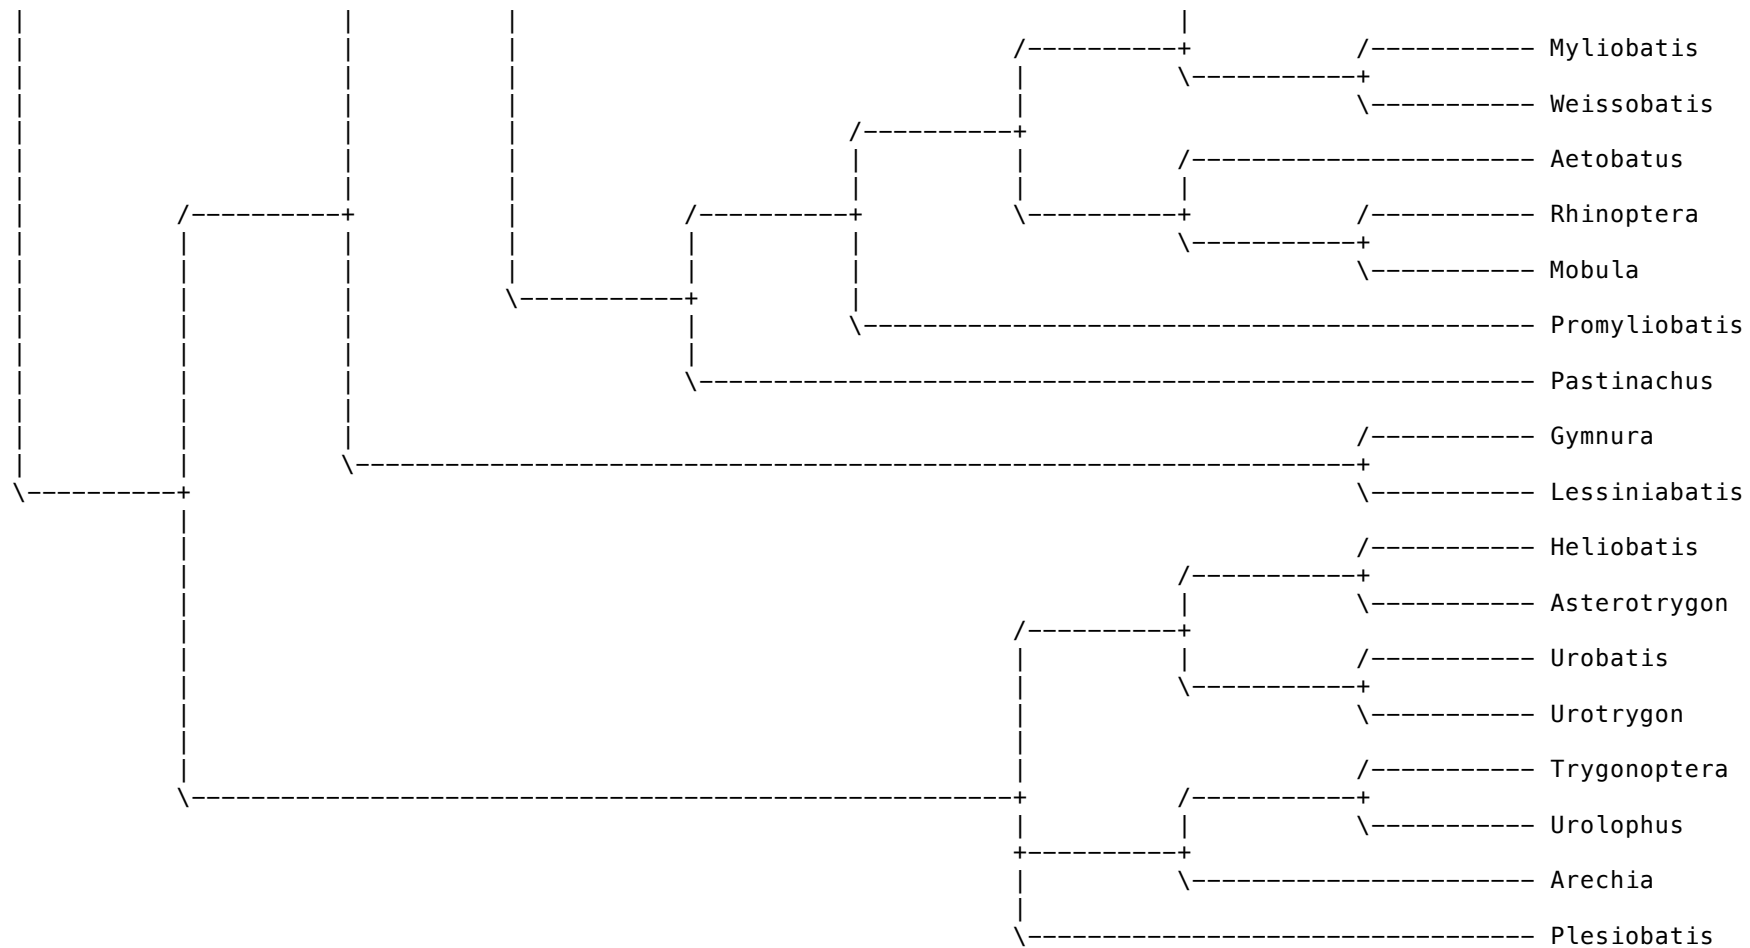

Tree 15 (rooted using user-specified outgroup)

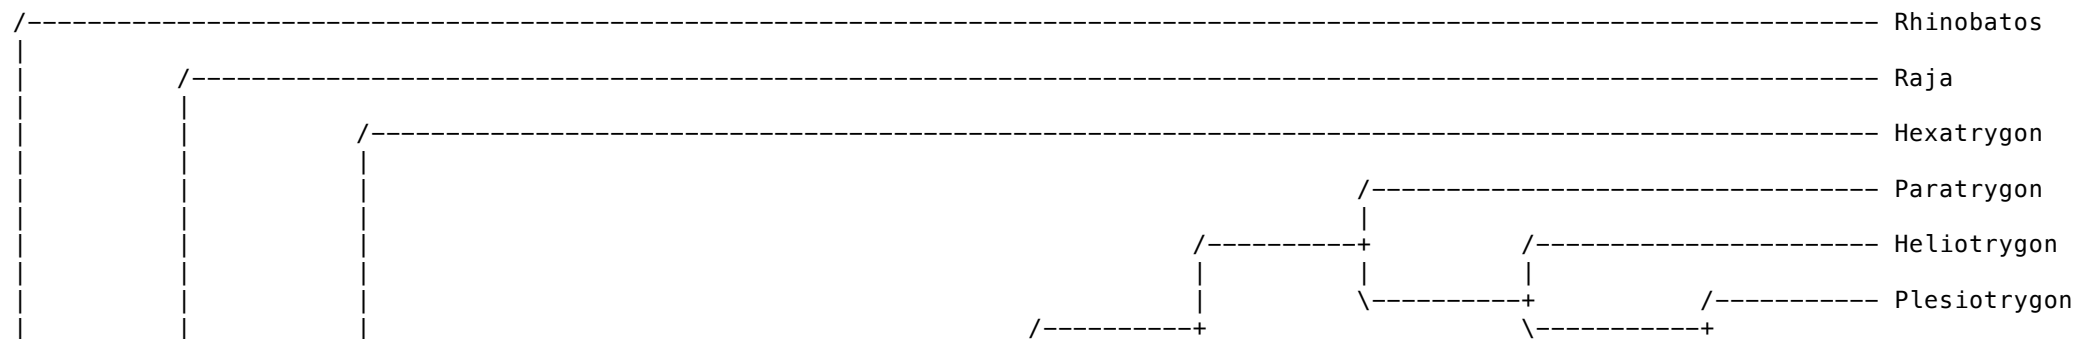

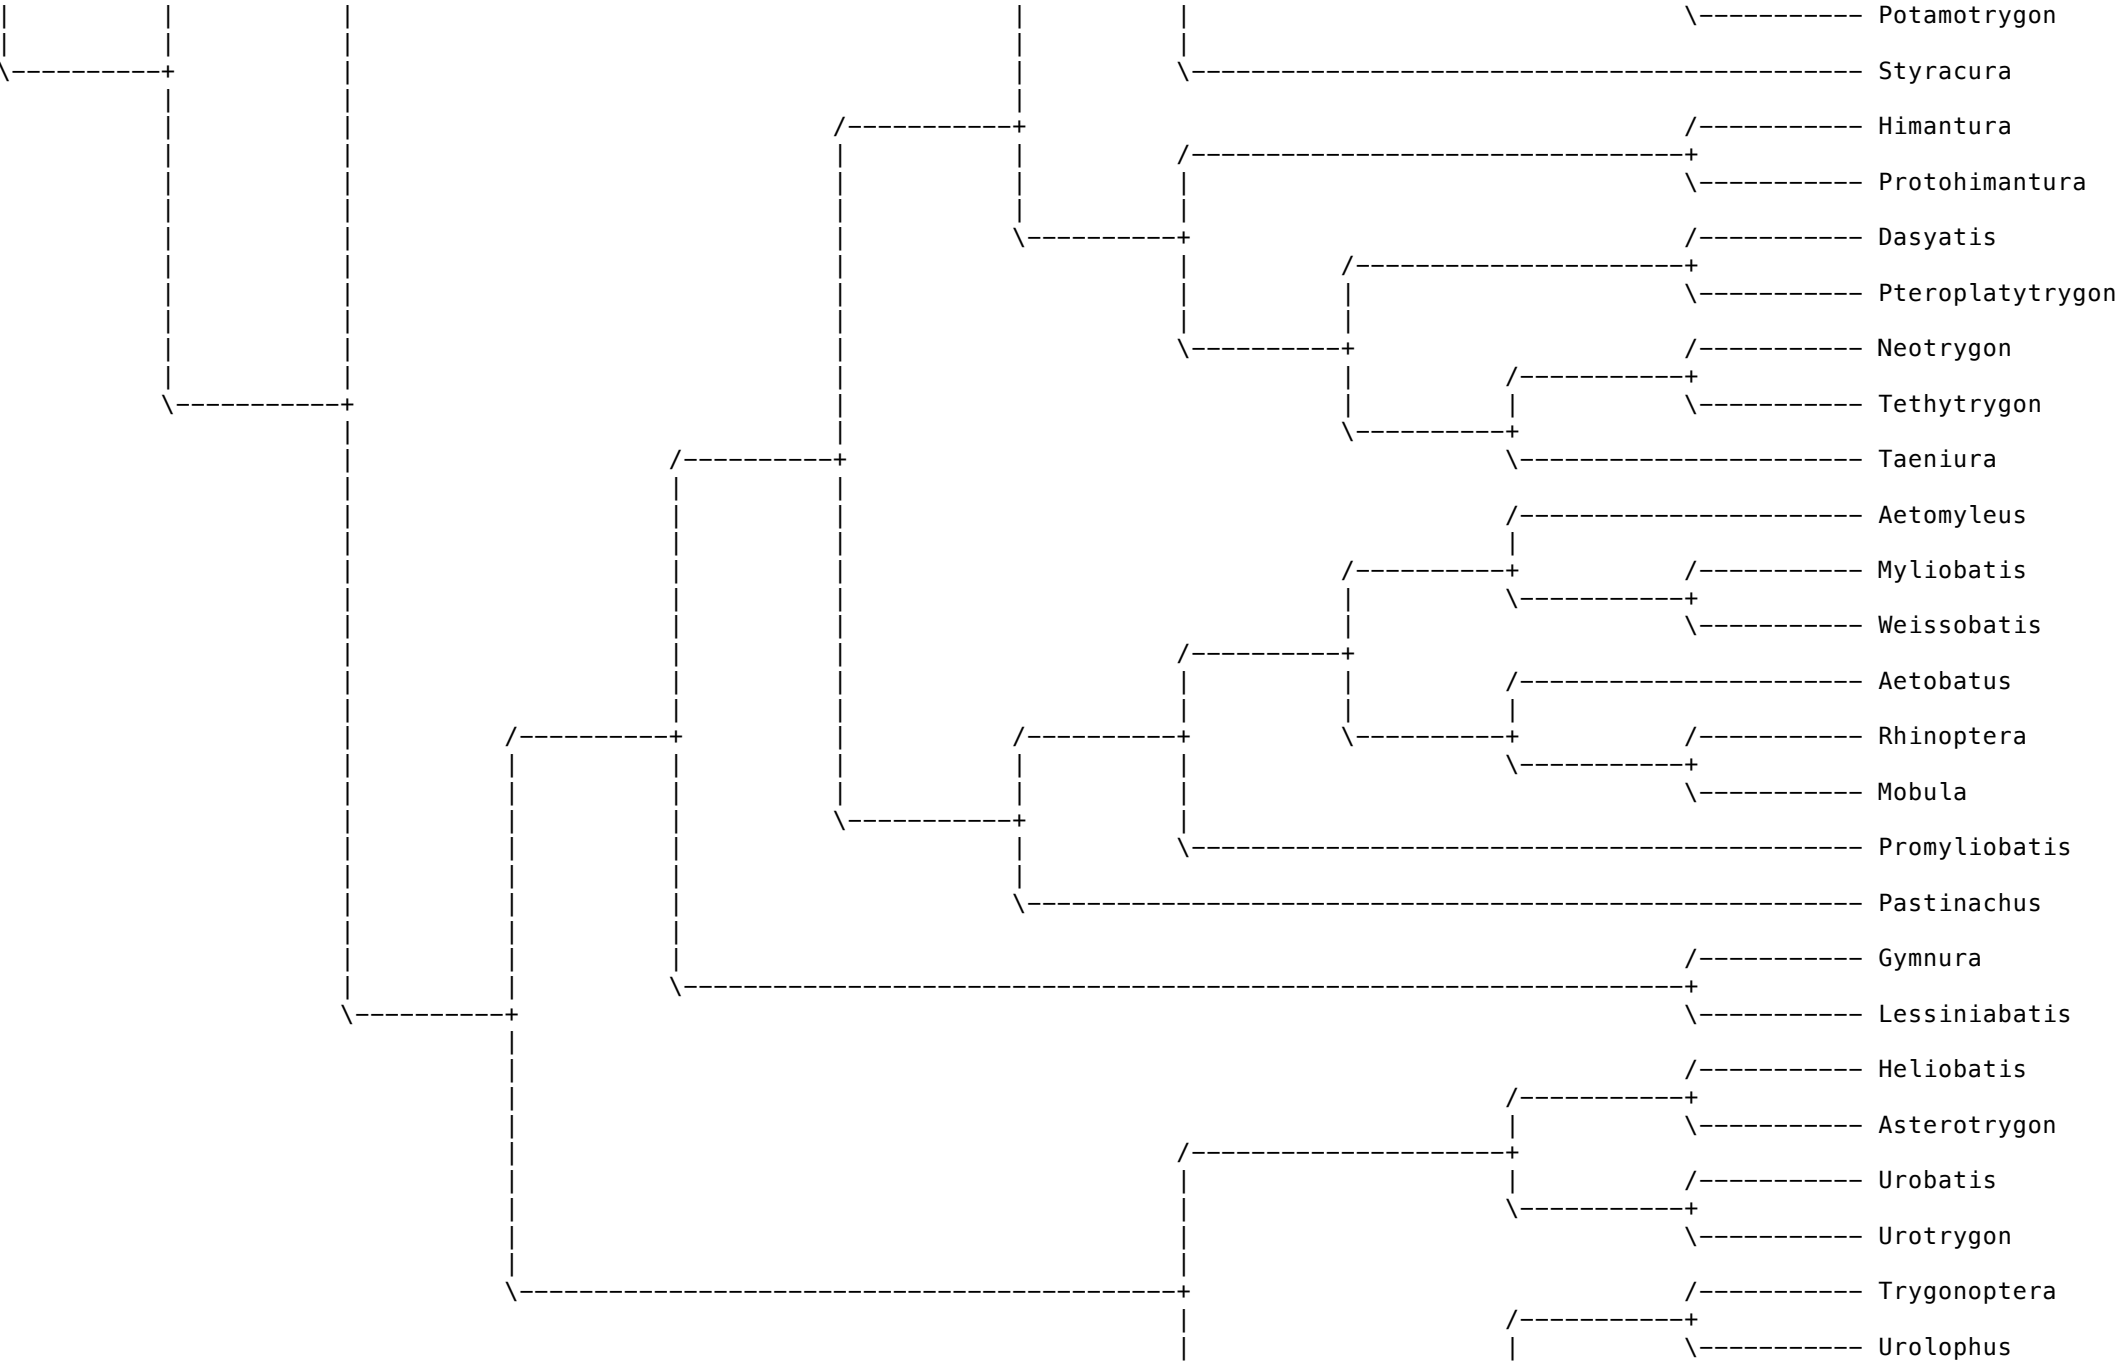

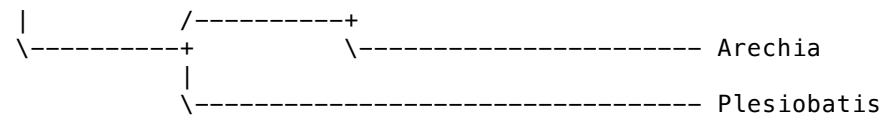

Tree 16 (rooted using user-specified outgroup)

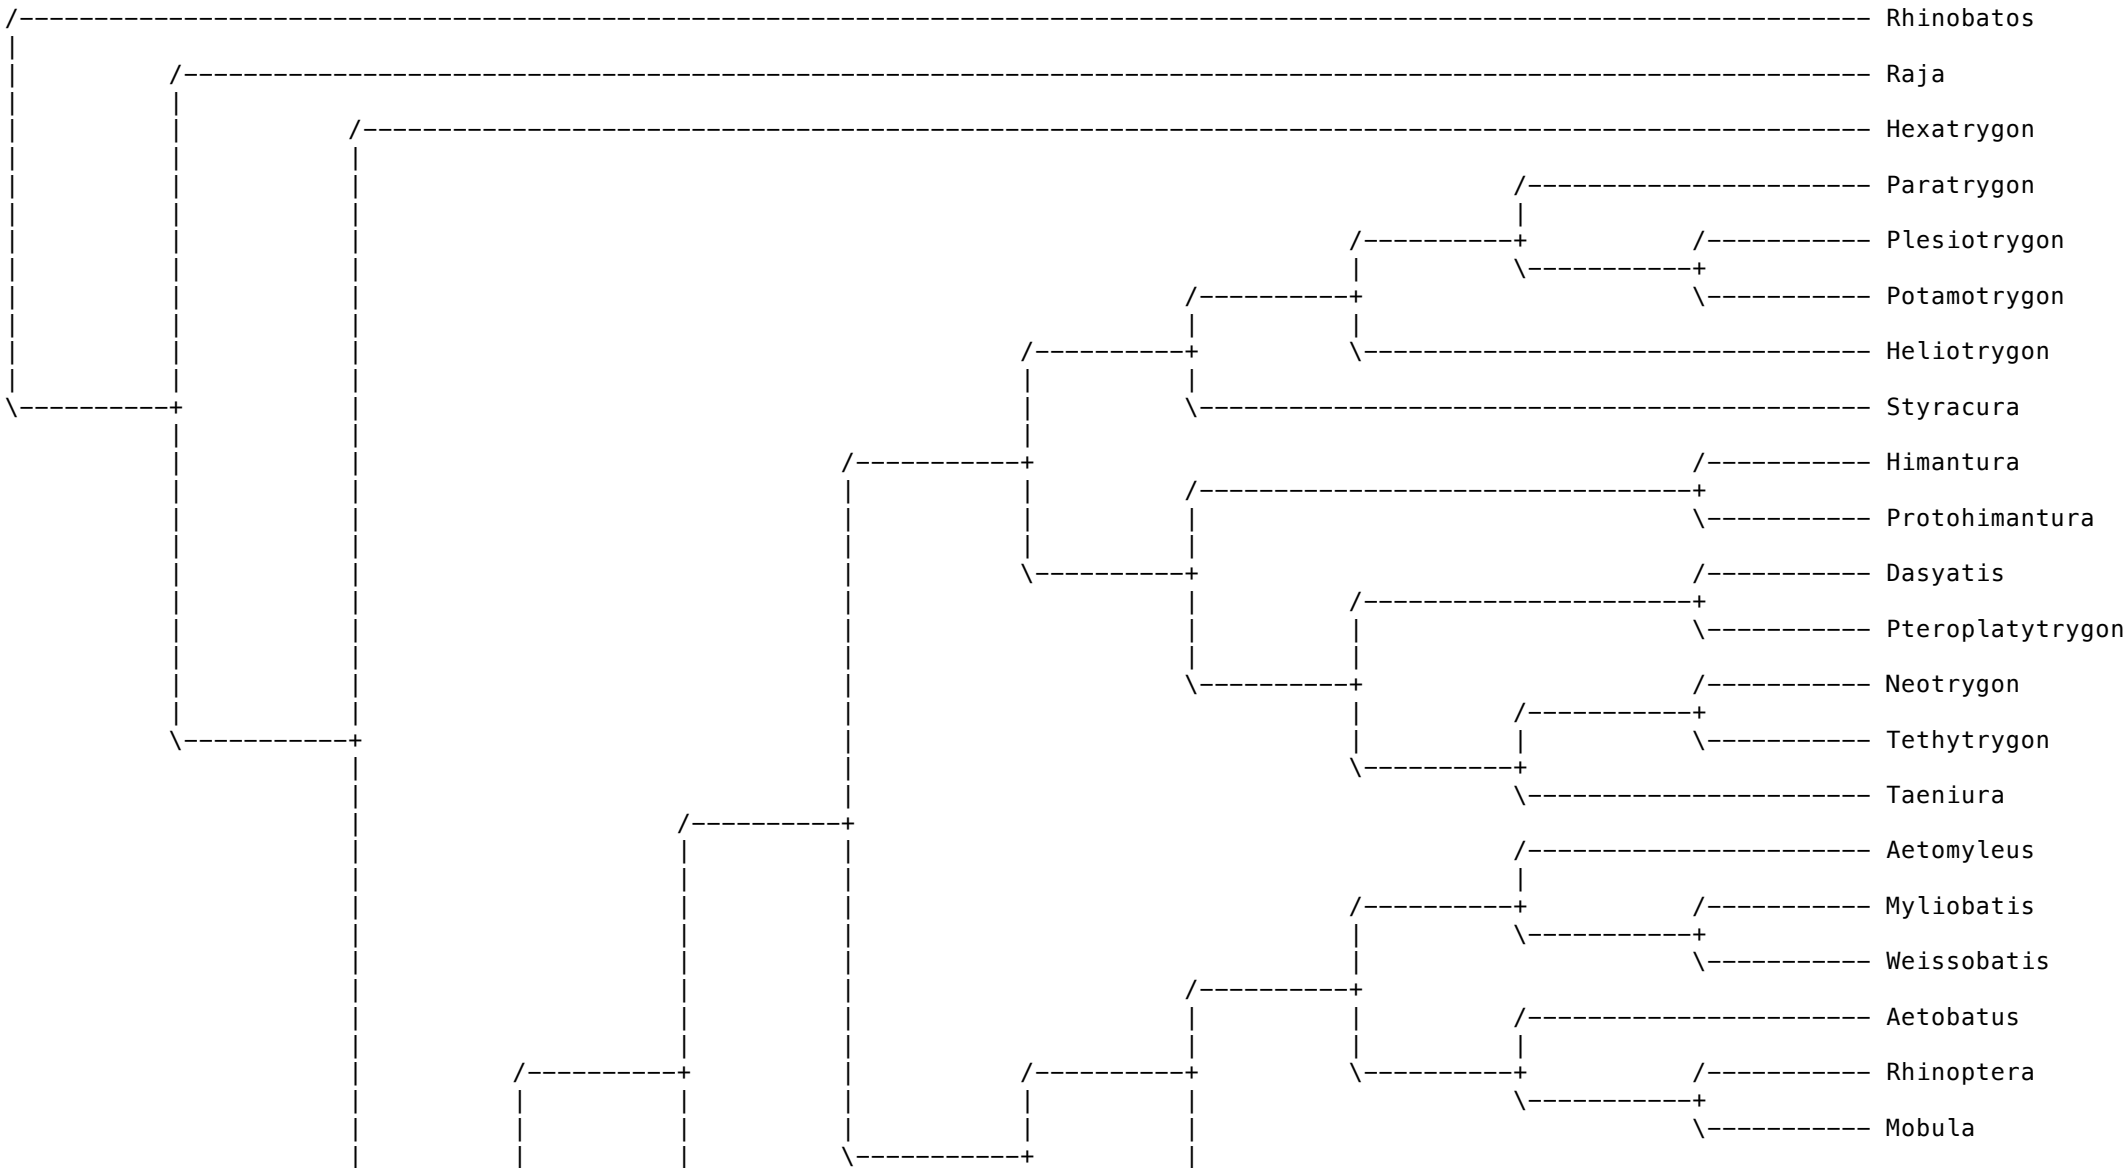

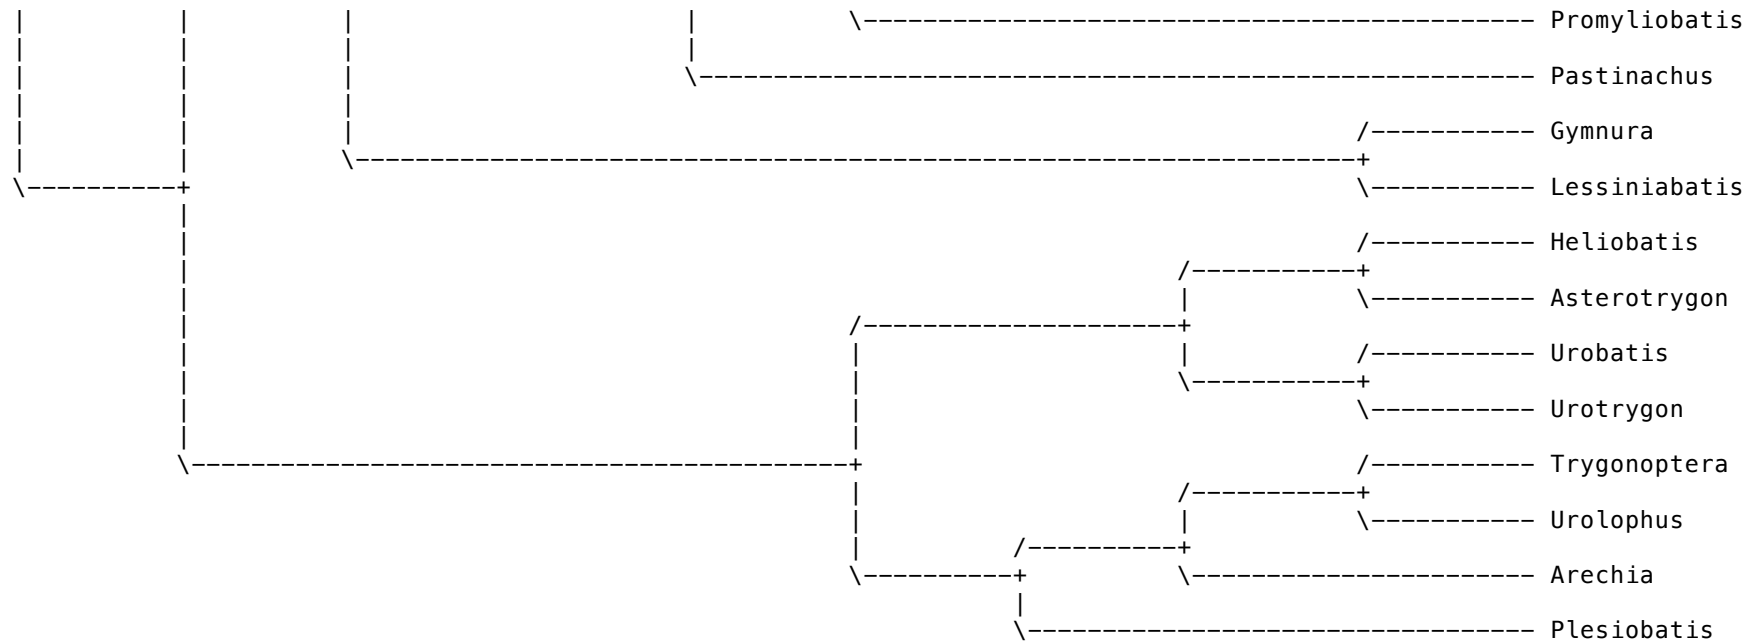

Tree 17 (rooted using user-specified outgroup)

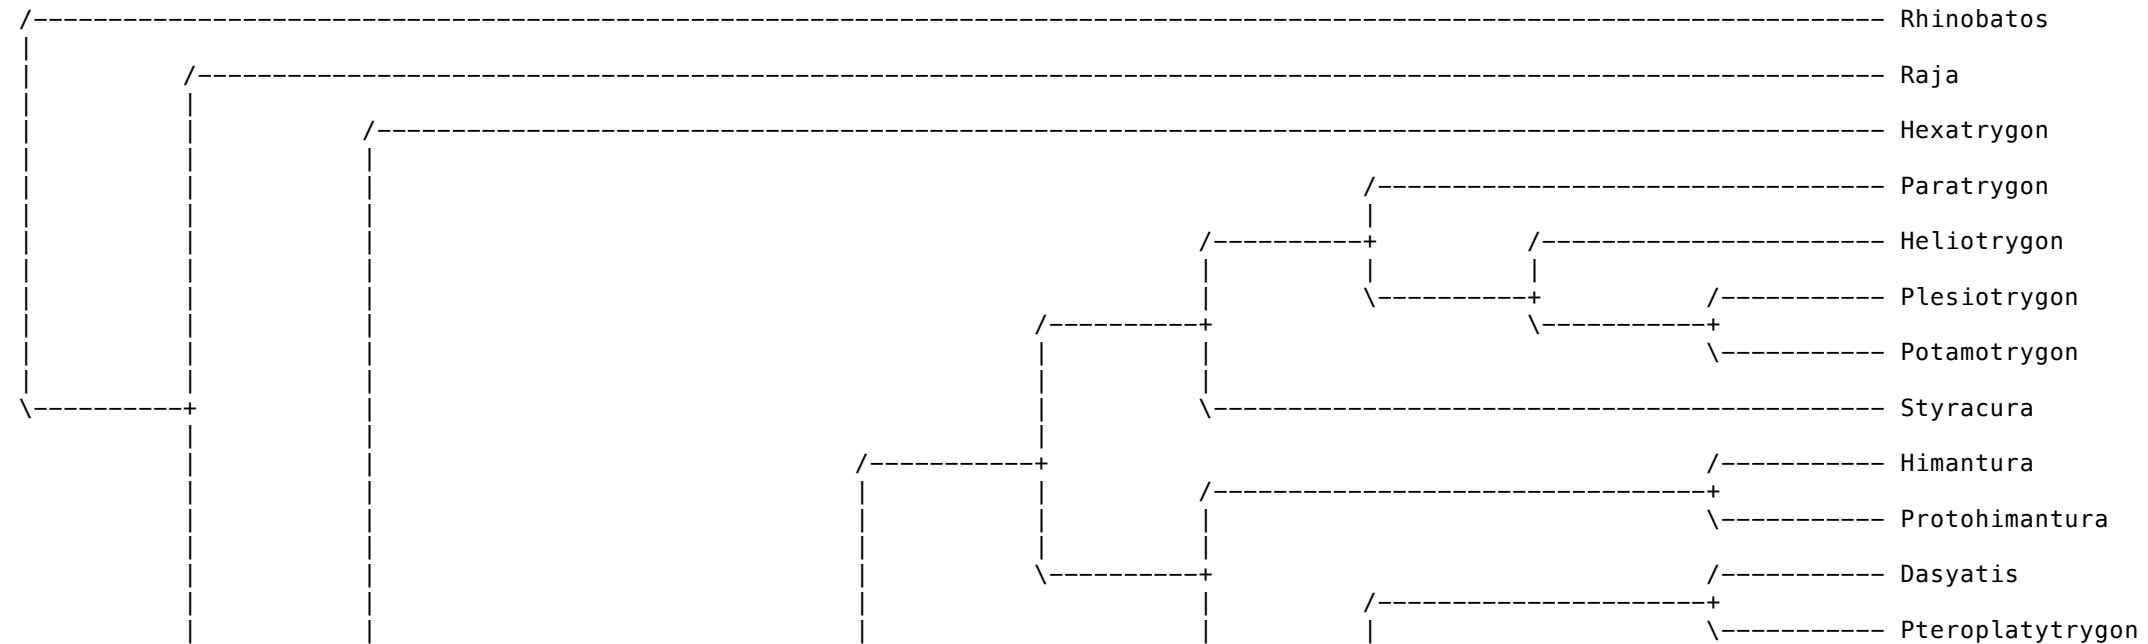

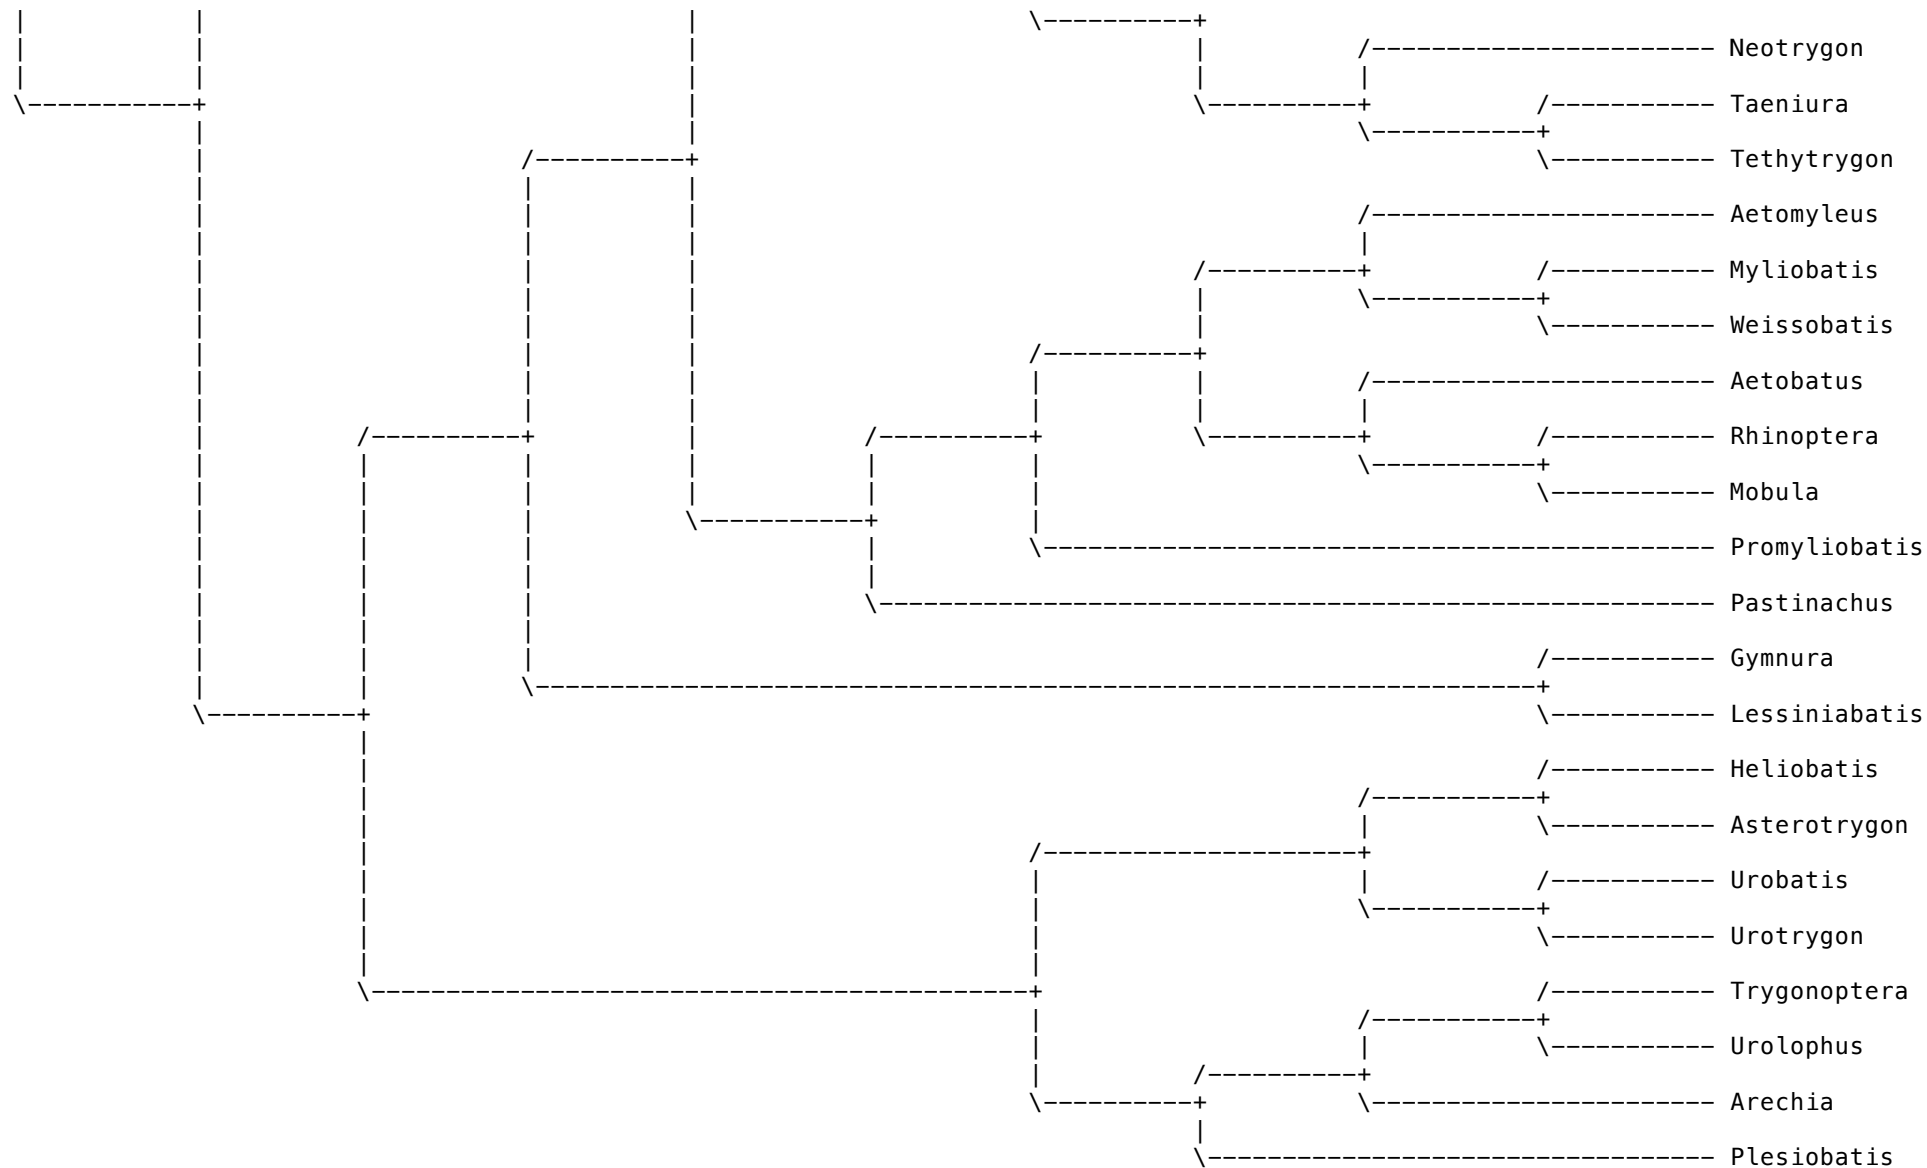

Tree 18 (rooted using user-specified outgroup)

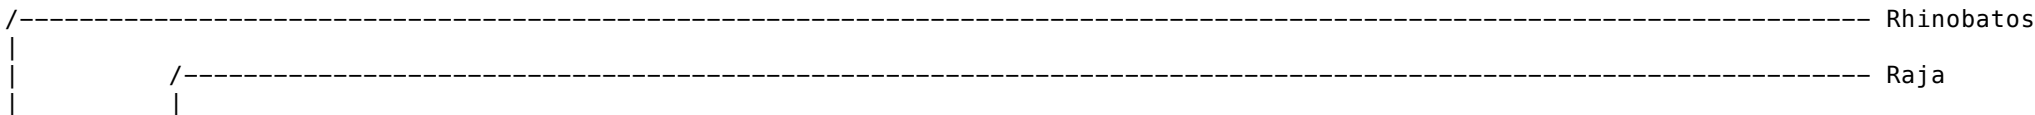



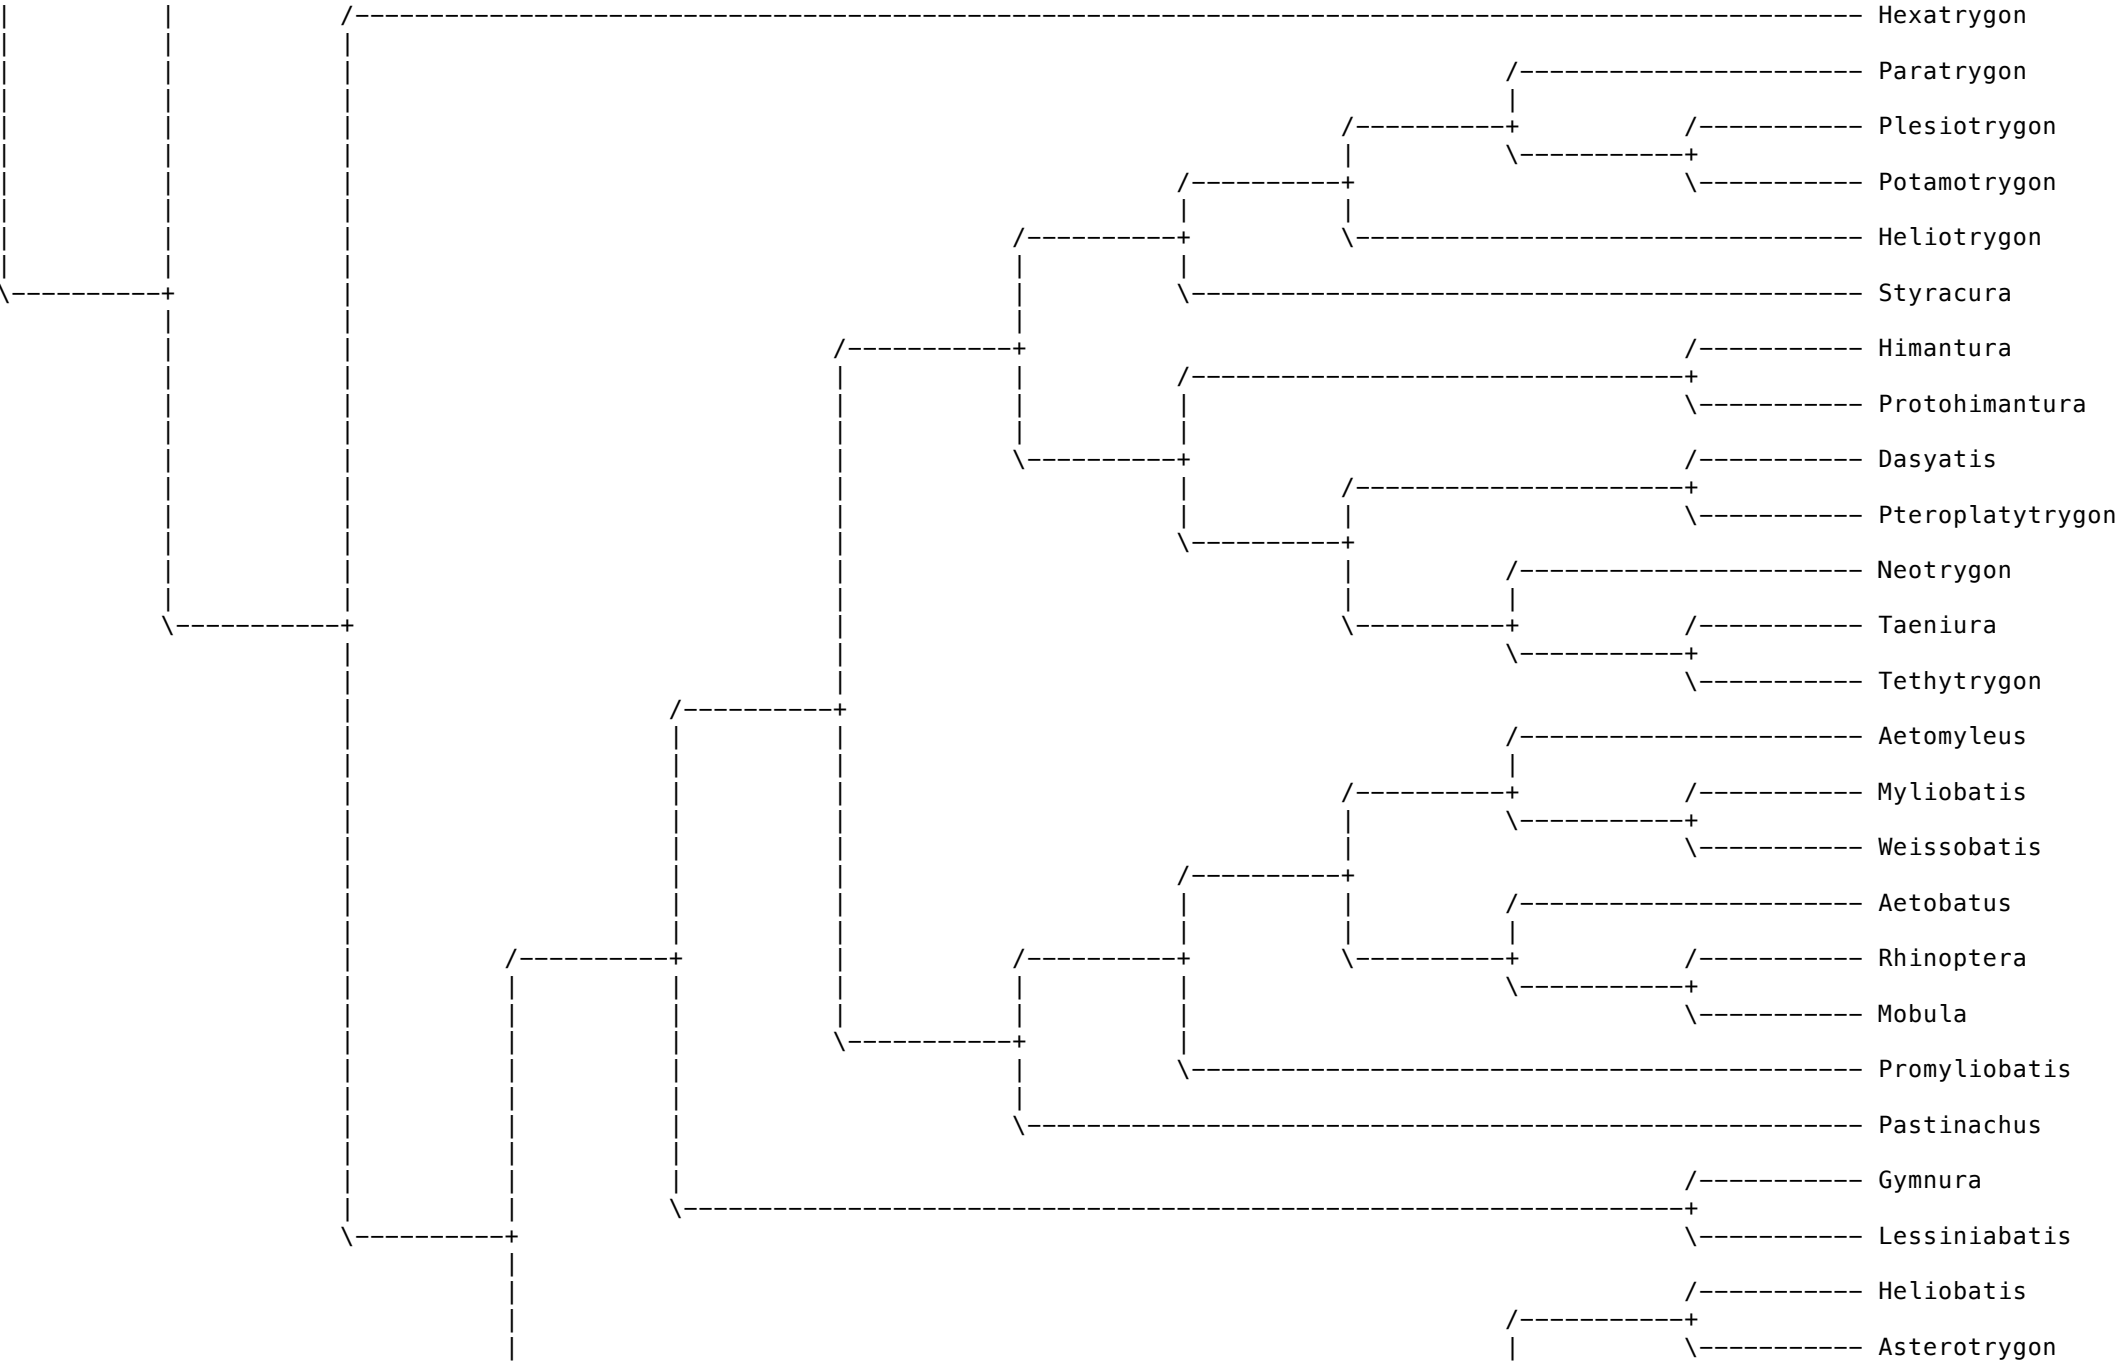

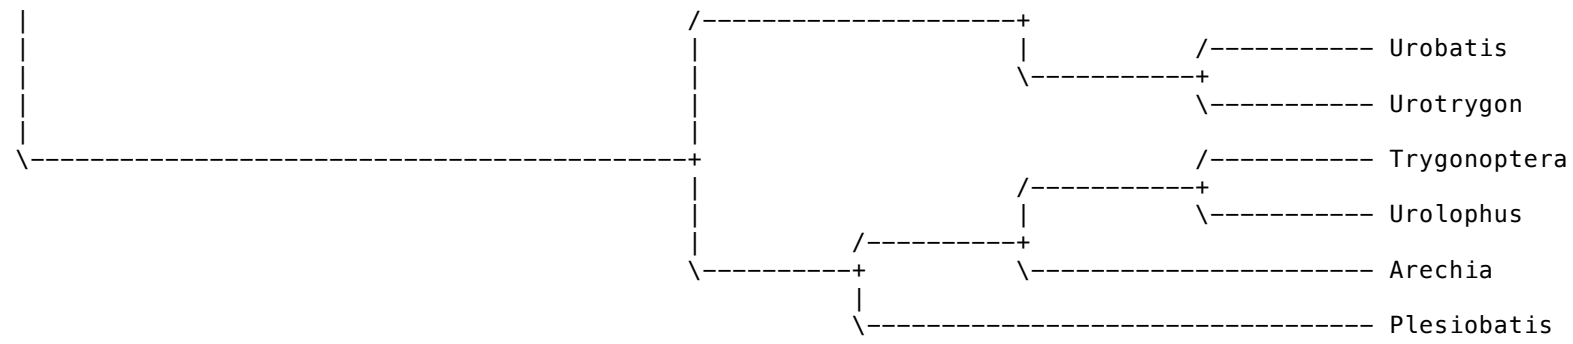

```
paup> Log File='/Users/a535-nbkriwet/Desktop/README.log' start;
```

```
-----NOTICE-----
This is a test version that is still changing rapidly.
It will expire on 1 Aug 2020.

Please report bugs to dave@phylosolutions.com
-----
```

```
#####
#
#           WARNING
#
#   The GUI version of PAUP for Mac will NOT run under
#   MacOS 10.15 (Catalina). Do not upgrade to Catalina
#   if having a GUI version of PAUP* on your Mac is more
#   important to you than having the latest MacOS version!
#
#   I hope to have a 64-bit version sometime in early 2020.
#   Please join the Google Group paup-announce to receive
#   update announcements.
#
#####
```

```
Logging output to file "~/Desktop/README.log".

Current directory set to /Users/a535-nbkriwet/Desktop

paup> Log;

Logging of output to file "README.log" discontinued.

Logging output to file "~/Desktop/README.log".
```
