# Supplementary material
Source: publisher figshare collection journal article supplement (https://tandf.figshare.com/articles/dataset/_/12994232)
Supplement: Supplementary file 2 [file 1]

README file for the parsimony analysis using Tree Analysis using New Technology (TNT v.1.5)

Reading from C:\Users\Giuseppe\Desktop\Works in progress\\_ELASMOBRANCHS

BOLCA\Manuscripts\Arechia\Arechia\_TNT.tnt

Matrix (102x33, 16 states). Memory required for data 0.16 Mbytes

0 trees in memory

Random seed is 1

Warning:

1000 reps. With 10 trees each exceeds available treespace (100)

Search may have to be interrupted if tree-buffer is filled

Repl. 1000

Algor. TBR

Tree 26 of 26

Score -----

Best score 215

Time 0:00:05

Rearrang. 32,156,150

Completed 1000 random addition sequences.

Total rearrangements examined: 32,156,150.

Best score hit 396 times out of 1000.

Best score (TBR): 215. 1 trees retained.

Time 5.11 secs.

Data matrix has 33 taxa, 102 characters

Valid character-state symbols: 01234

Missing data identified by '?'

Gaps identified by '-'

Character types changed:

Of 102 total characters:

All characters are of type 'unordered'

All characters have equal weight

Outgroup status:

2 taxa transferred to outgroup

Total number of taxa now in outgroup = 2

Number of ingroup taxa = 31

Taxon-status summary:

Original data matrix contains 33 taxa

No taxa have been deleted

Number of (nondeleted) outgroup taxa = 2

Character-status summary:

Current optimality criterion = parsimony

No characters are excluded

Of 102 total characters:

All characters are of type 'unordered'

All characters have equal weight

3 characters are constant (proportion = 0.0294118)

10 variable characters are parsimony-uninformative

Number of parsimony-informative characters = 89

Traditional search settings (branch-and-bound):

Starting trees:

- 1 random seed

- 1000 repls.

Swapping algorithm:

- tree bisection reconnection (TBR)

Trees to save per replication 10

Collapse trees after the search

Replace existing trees
